# Supplementary material
Source: ML conference proceedings conference paper supplement (https://openaccess.thecvf.com/content/CVPR2021/html/Zheng_Unsupervised_Disentanglement_of_CVPR_2021_paper.html)
Supplement: Supplementary file 1 [file Zheng_Unsupervised_Disentanglement_of_CVPR_2021_supplemental.pdf]

# Supplementary material

## 1 Additional results on univariate semantics

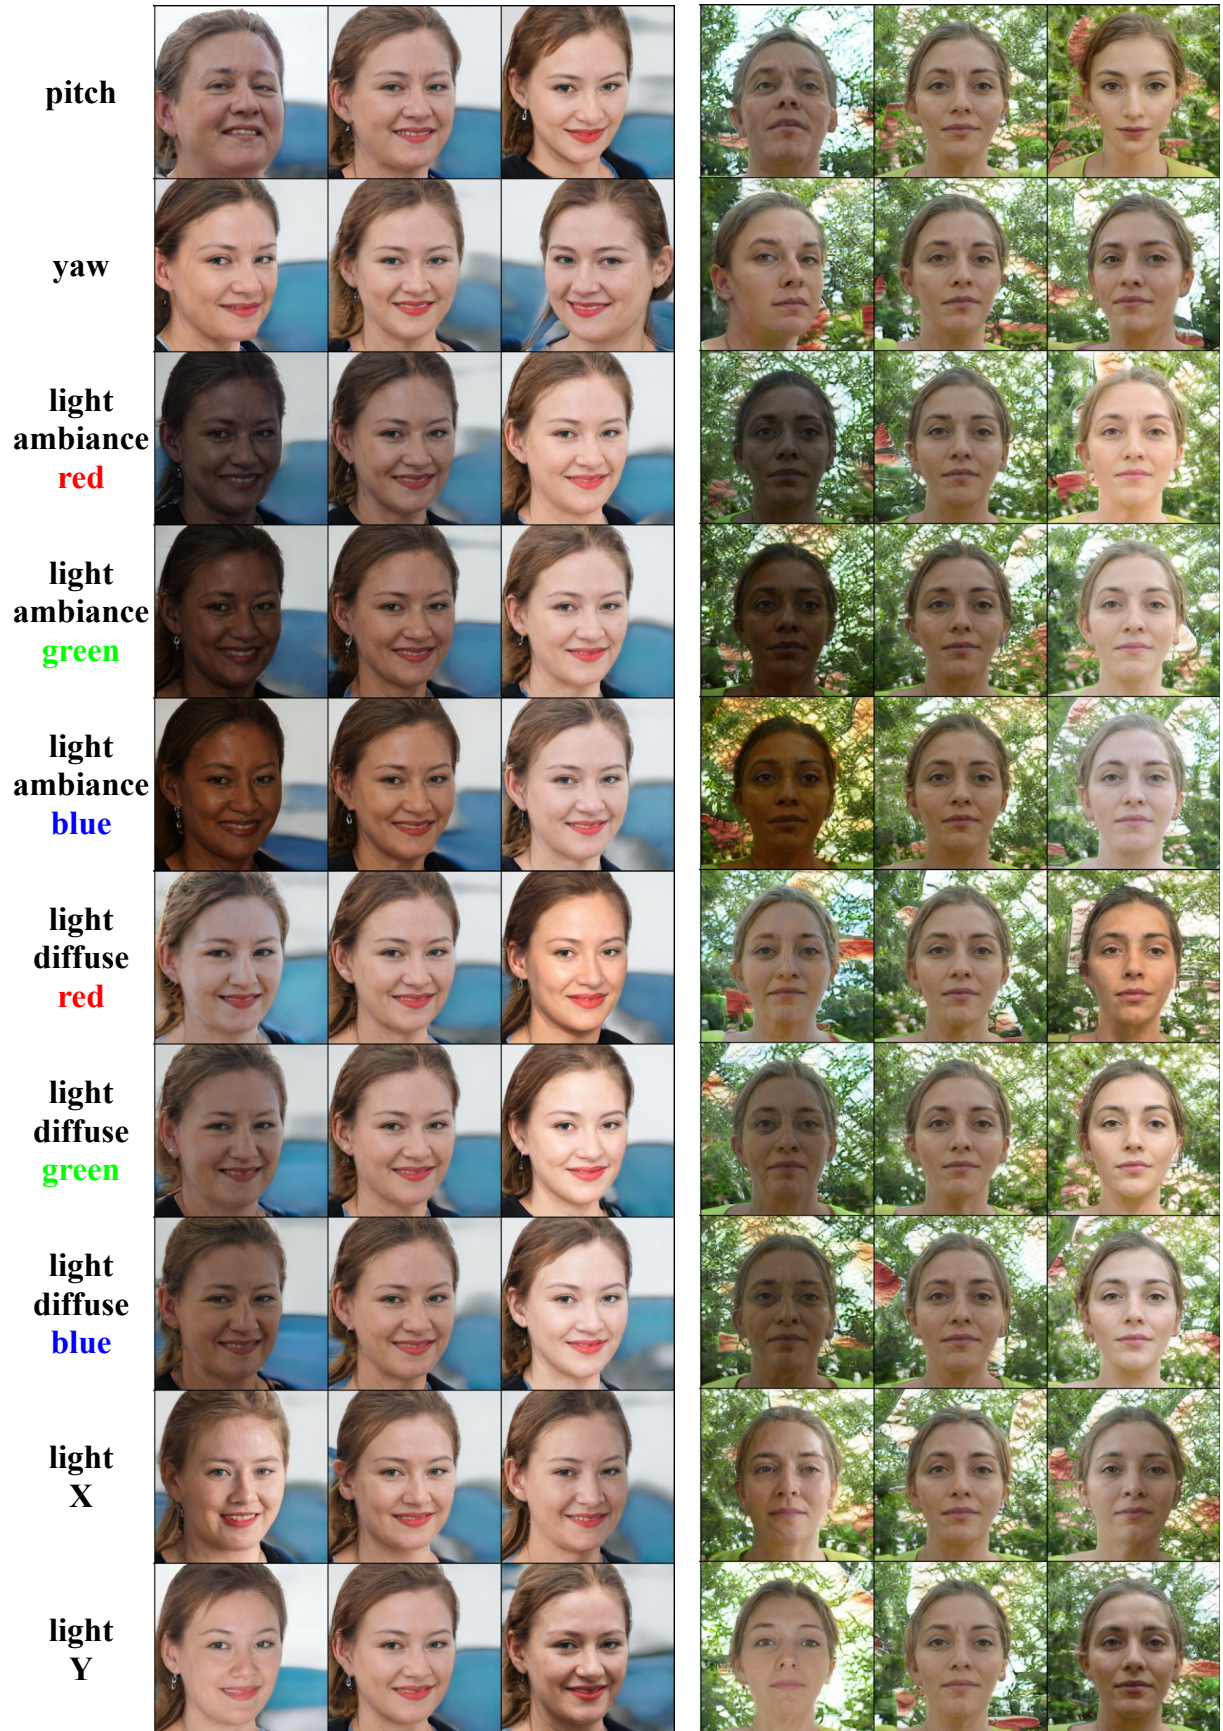

Figure 1: FFHQ samples.



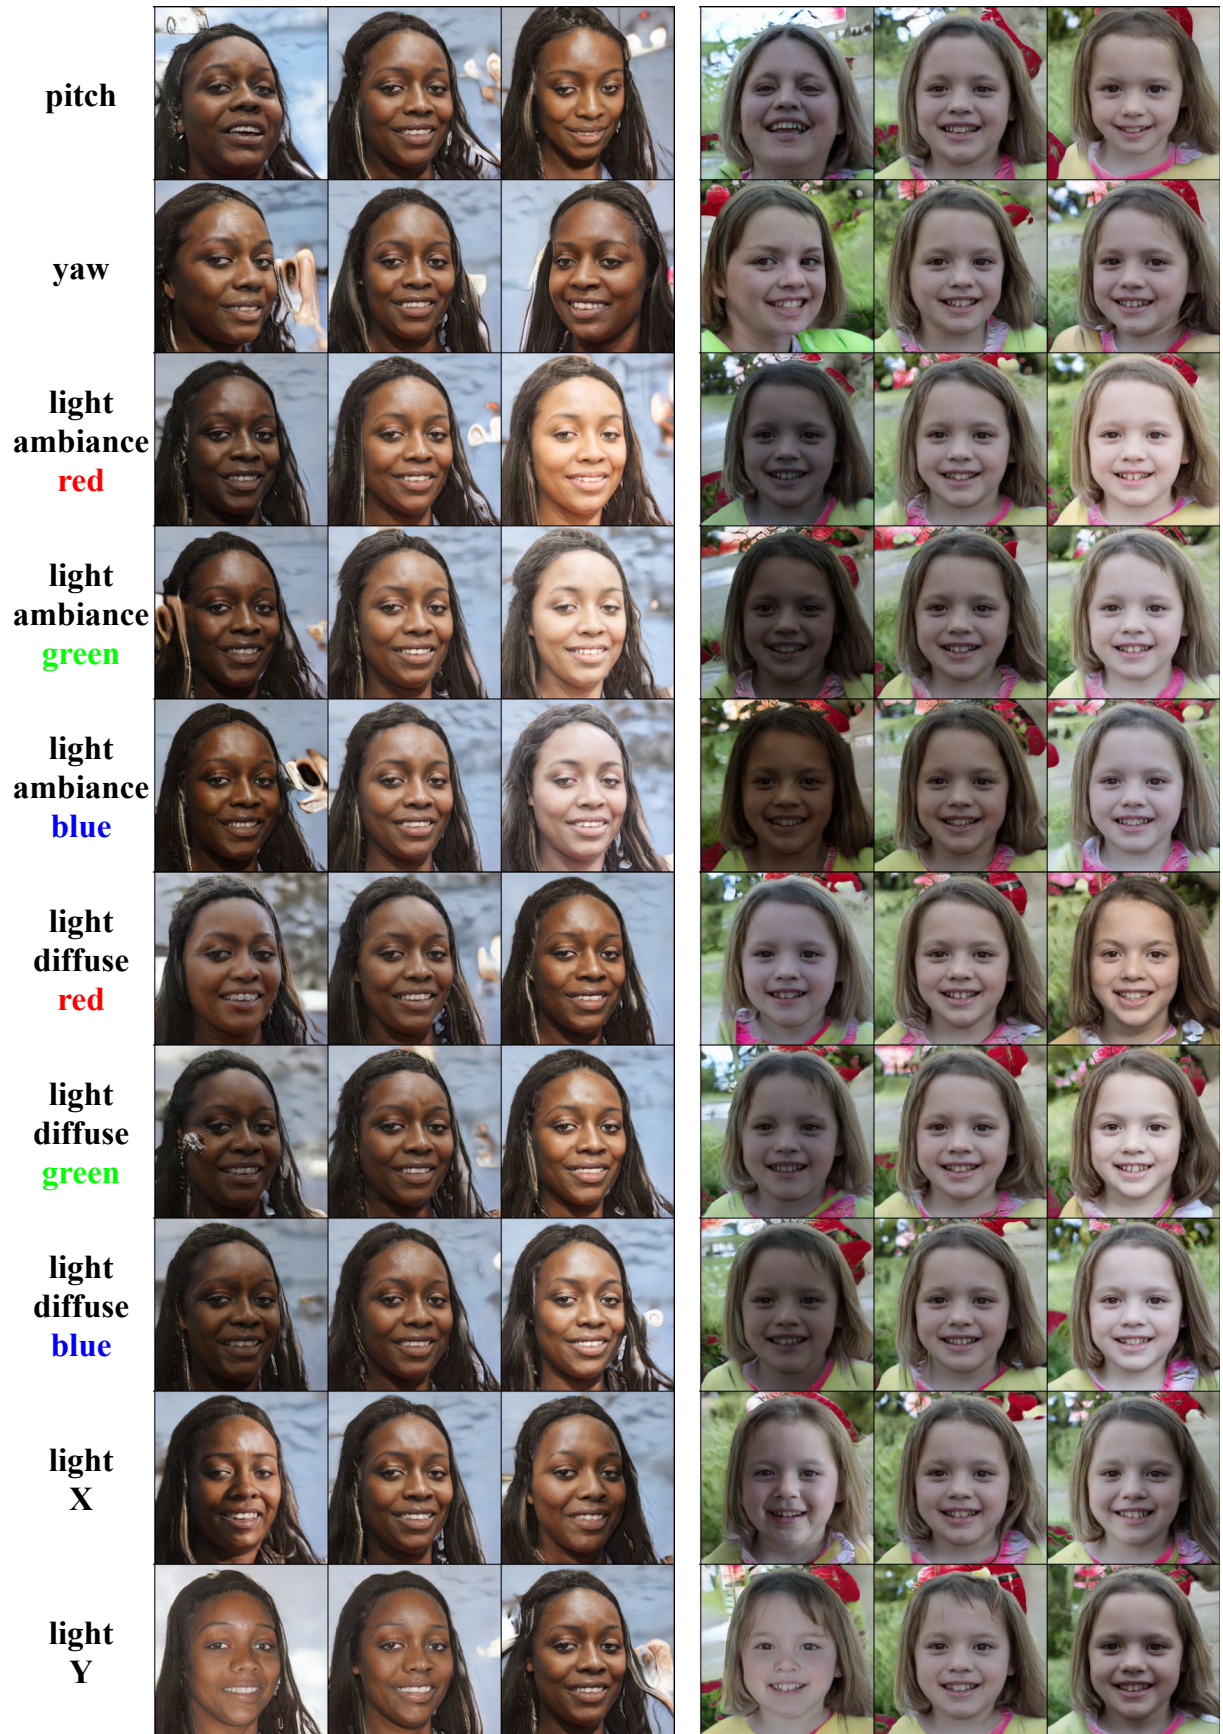

Figure 2: FFHQ samples.



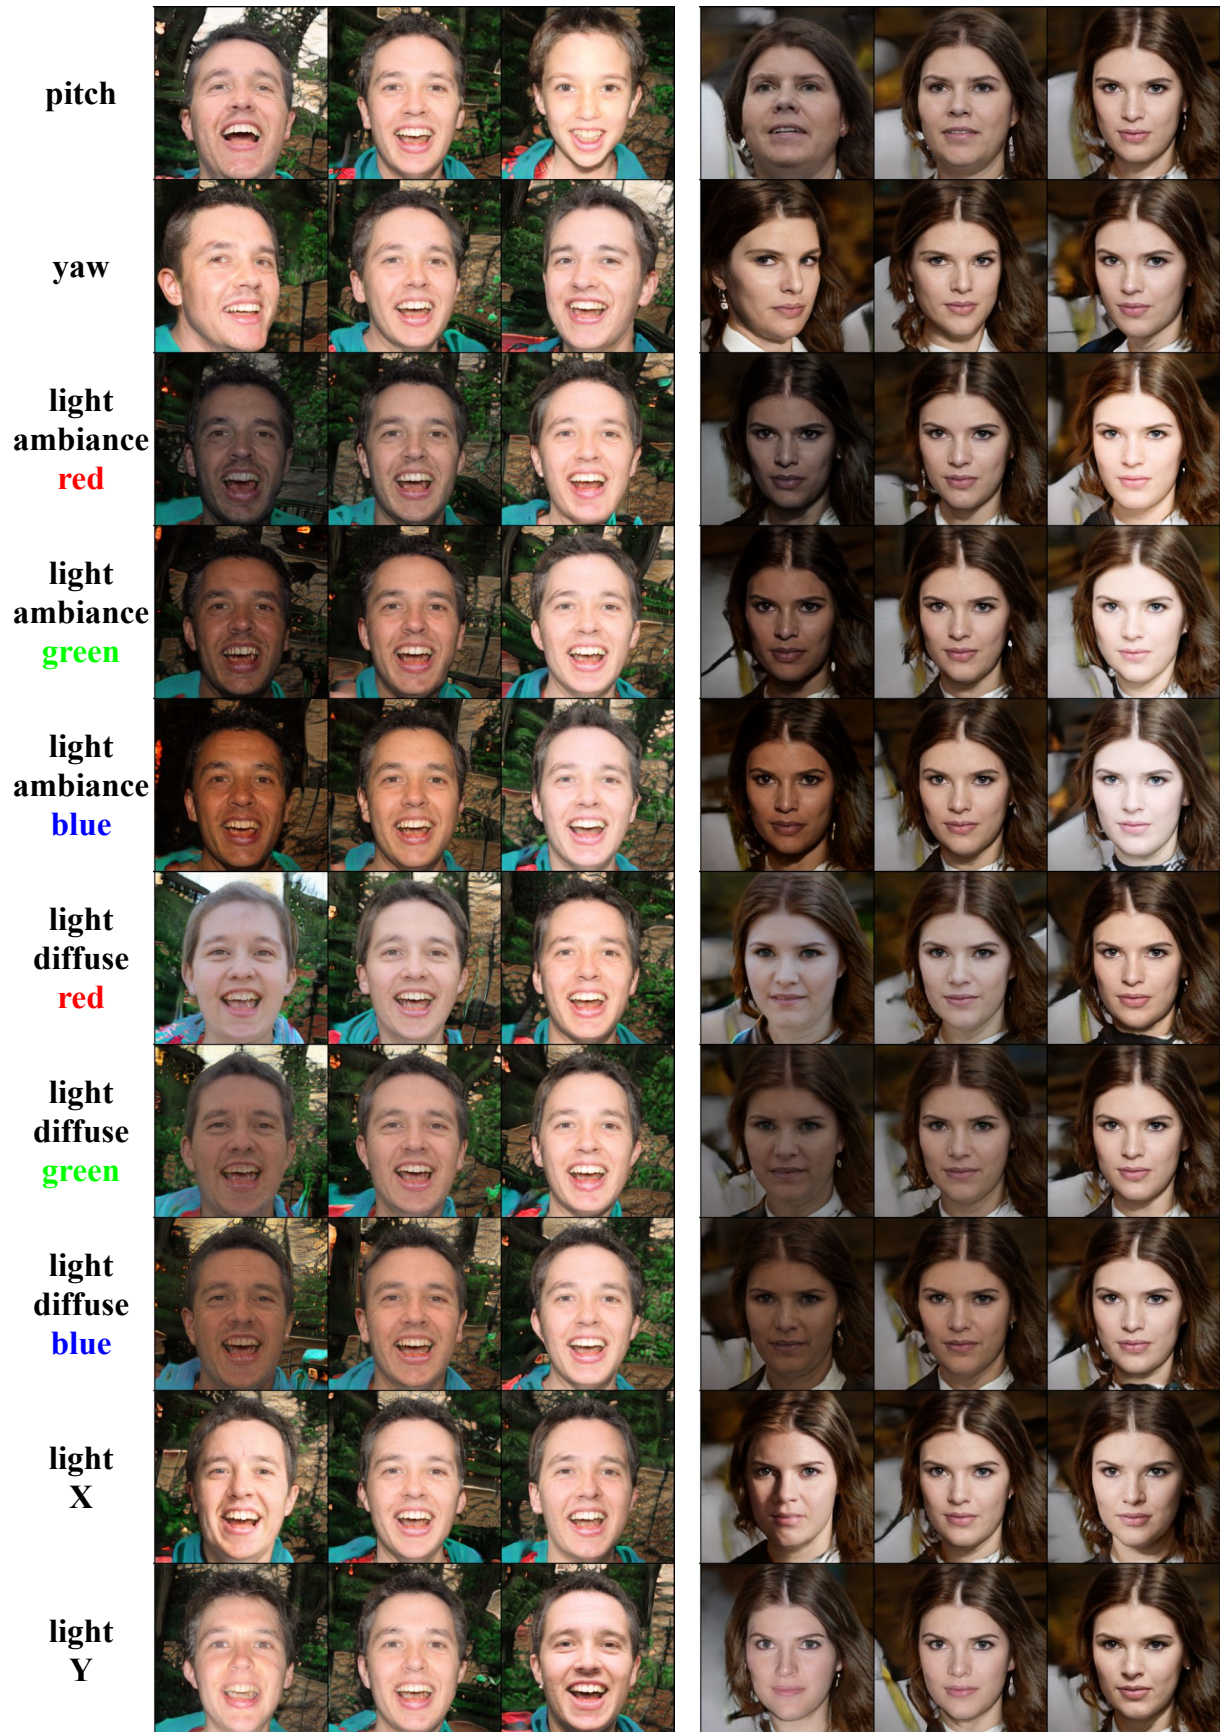

Figure 3: FFHQ samples.



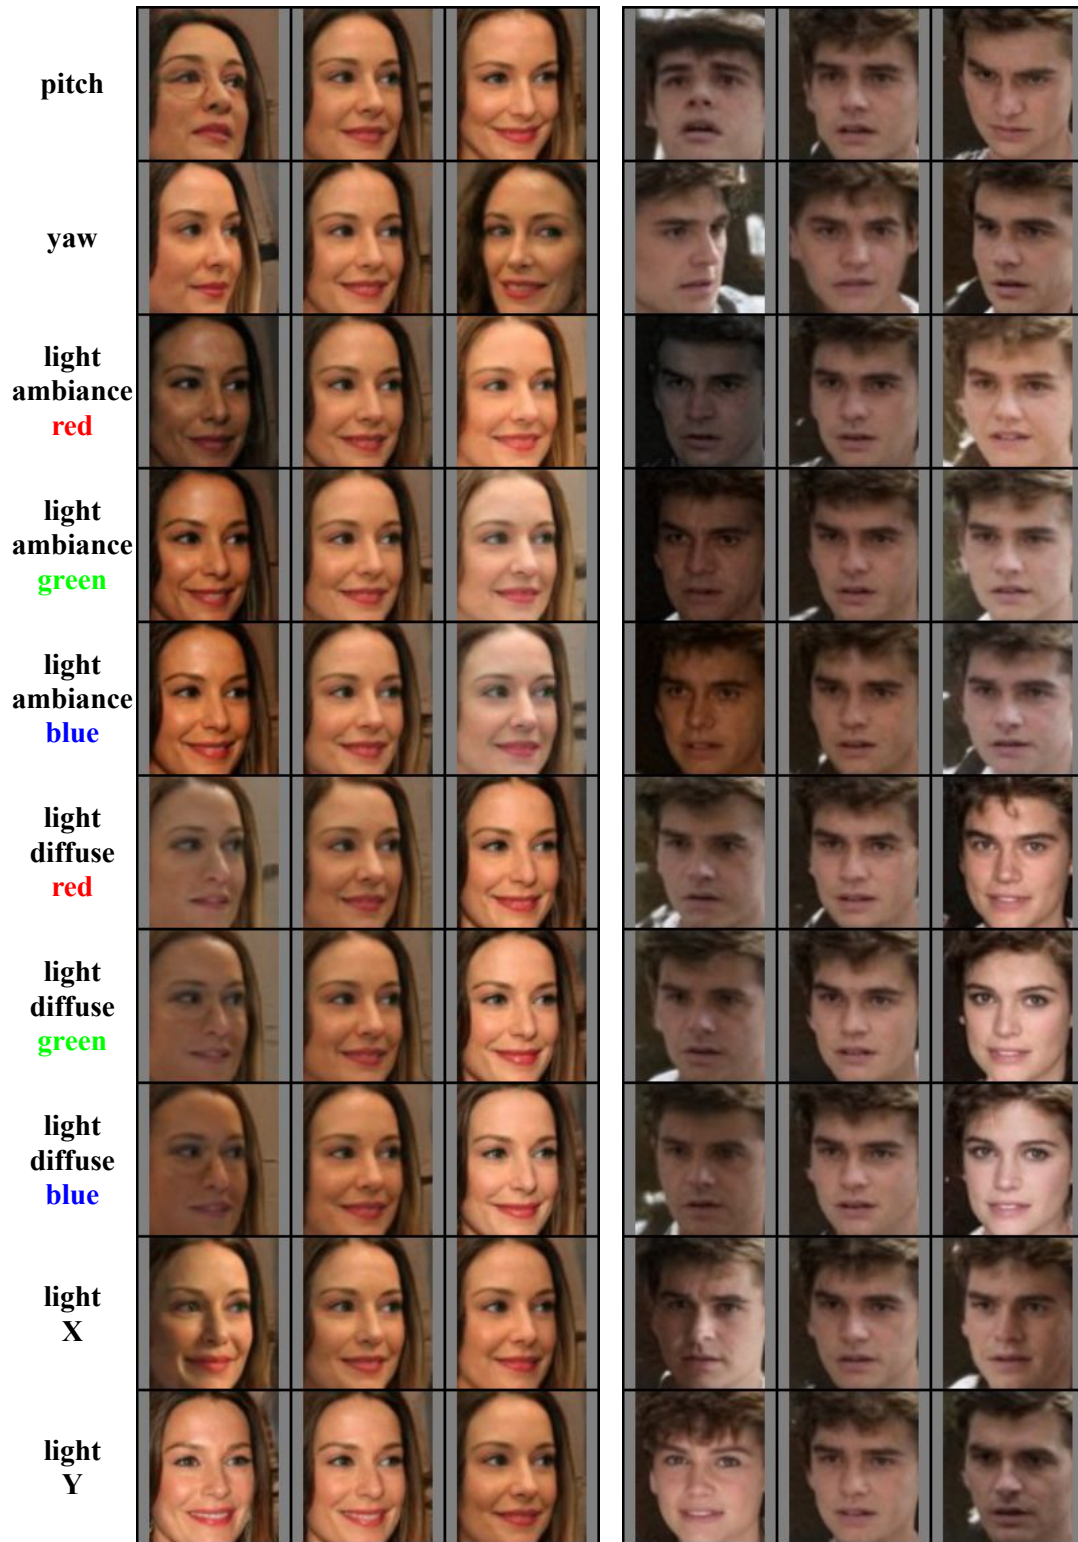

Figure 4: CASIA samples.



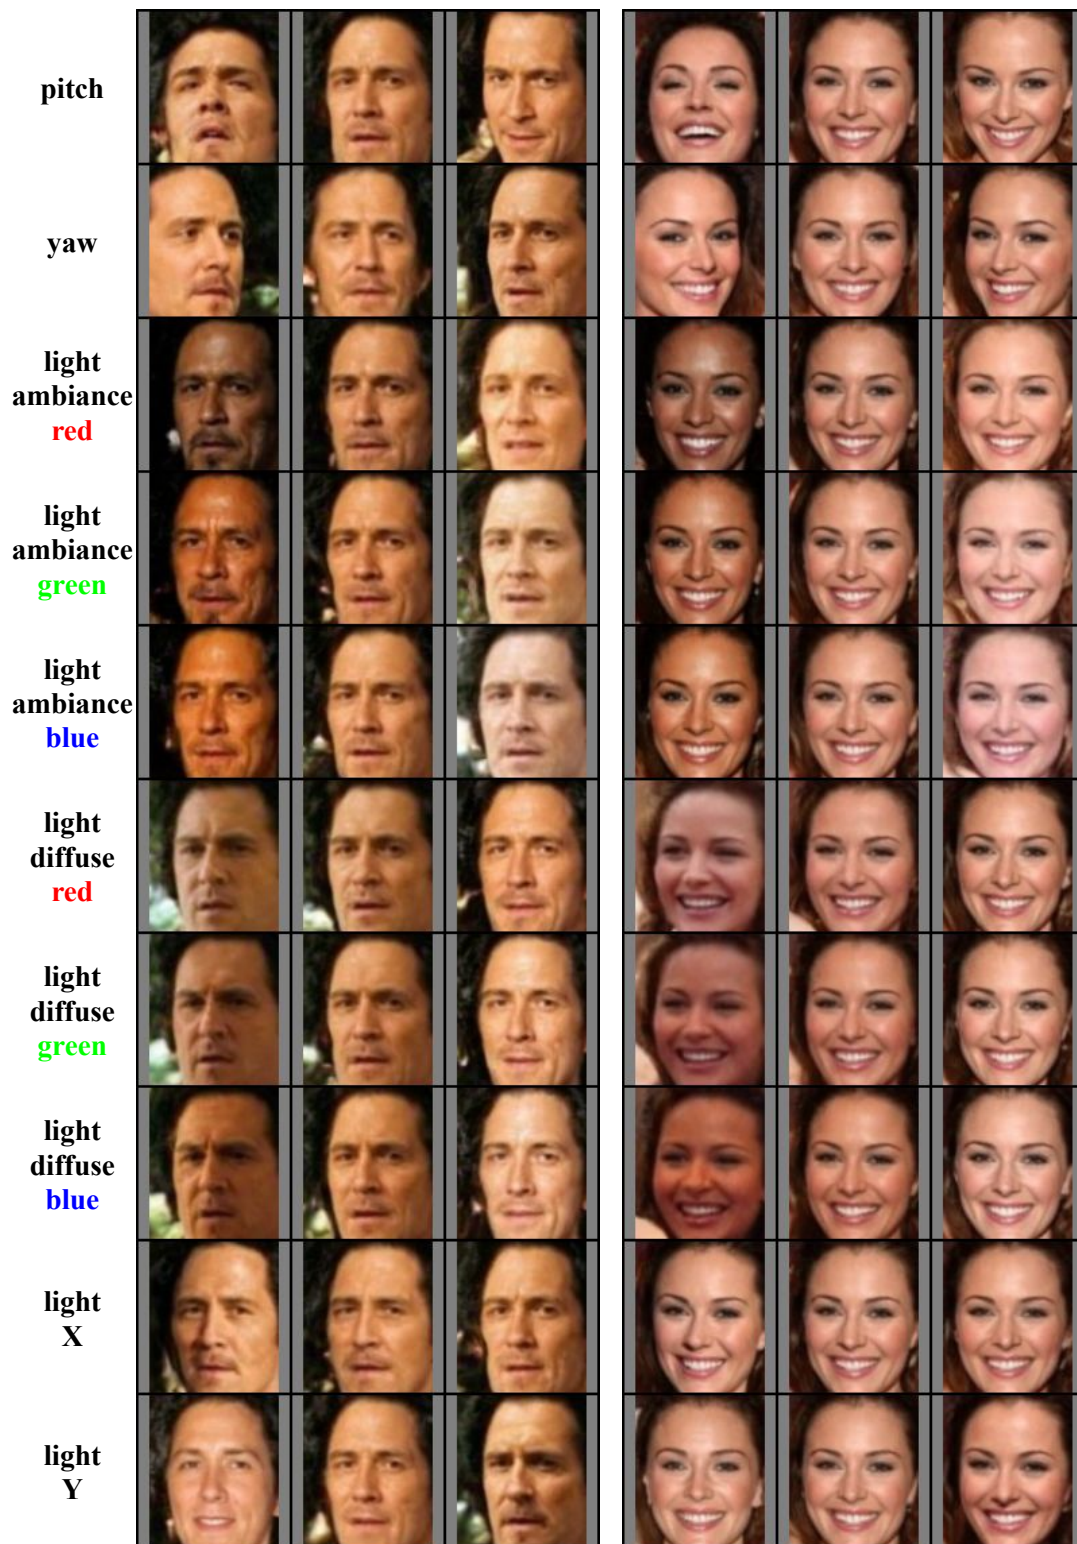

Figure 5: CASIA samples.



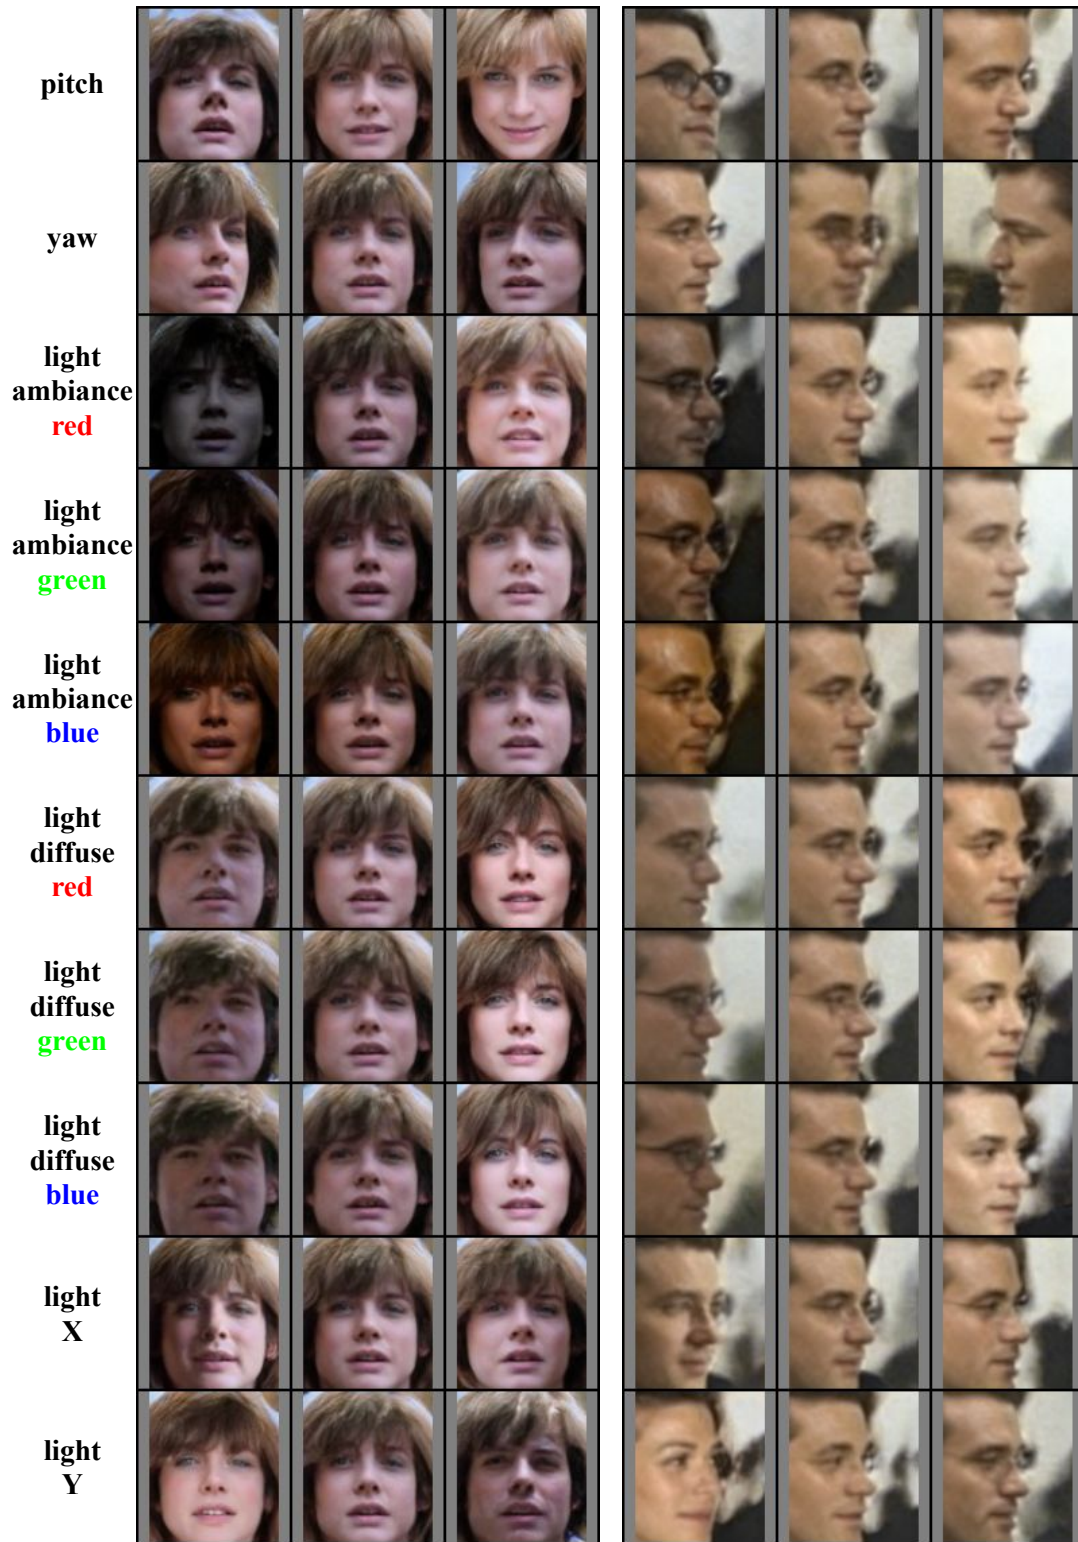

Figure 6: CASIA samples.



## 2 Additional results on canonical semantics manipulation

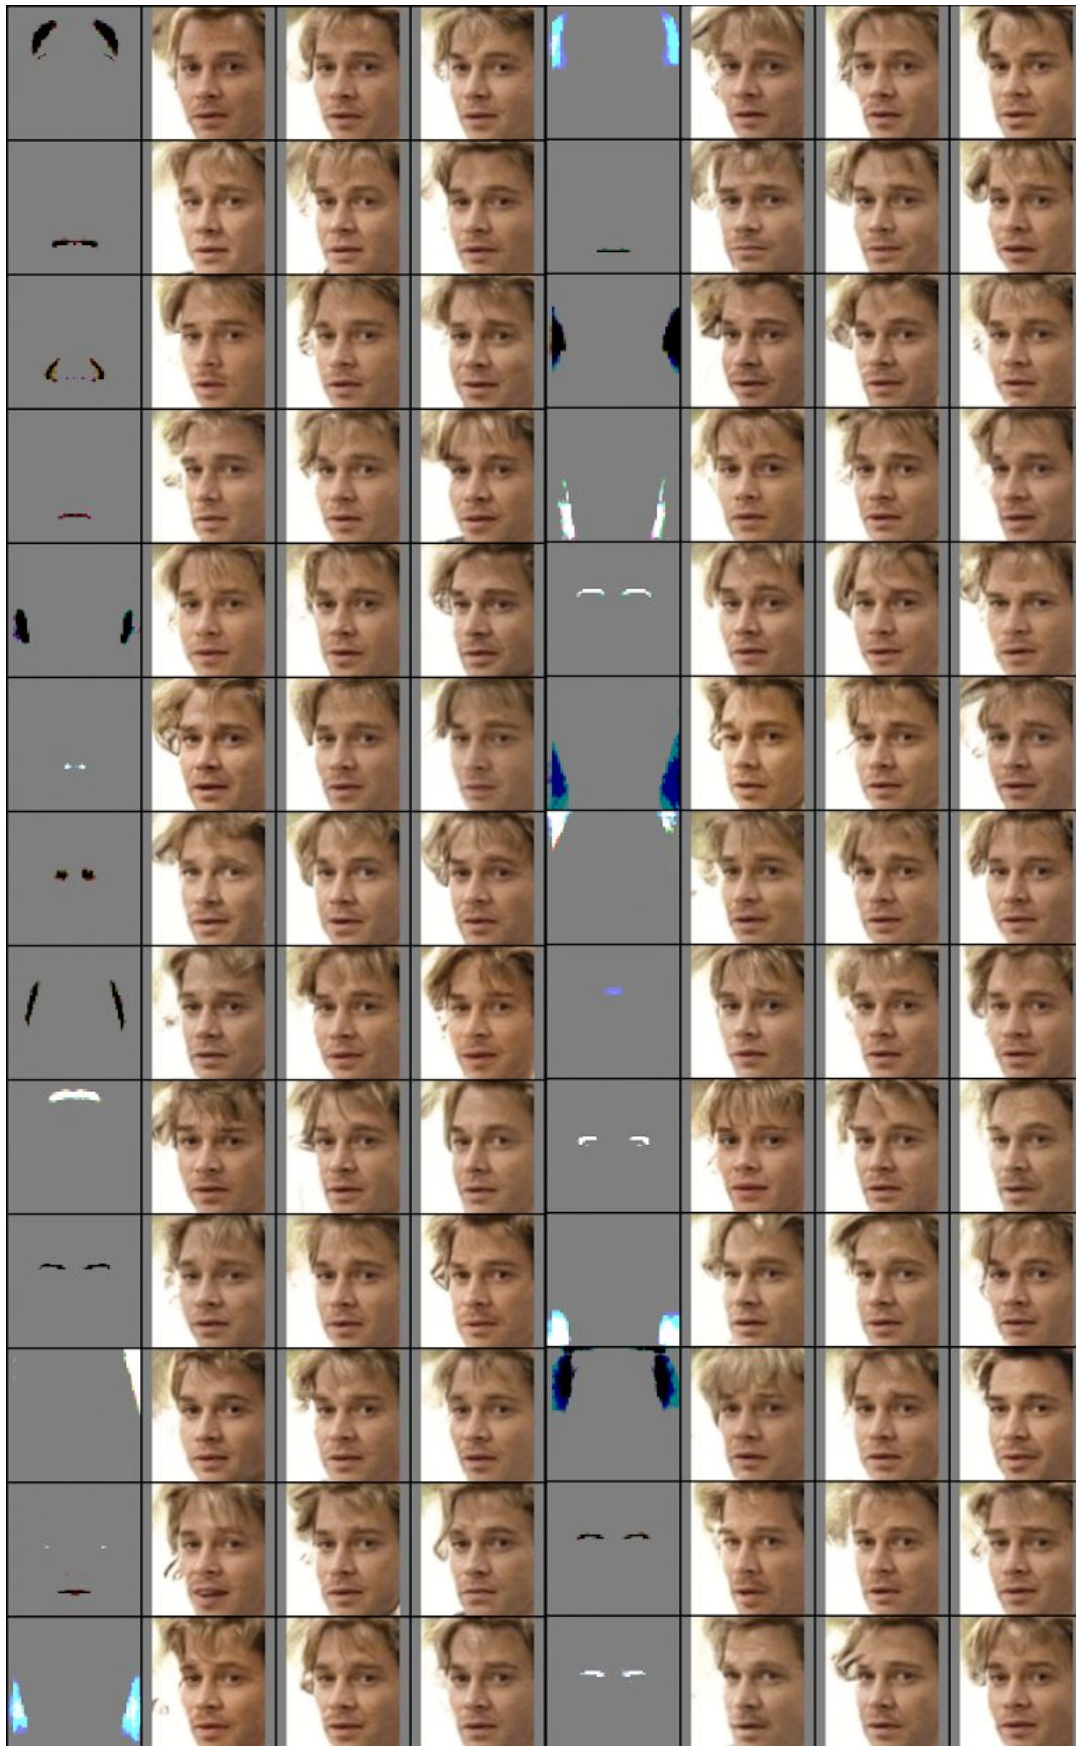

Figure 7: CASIA samples.



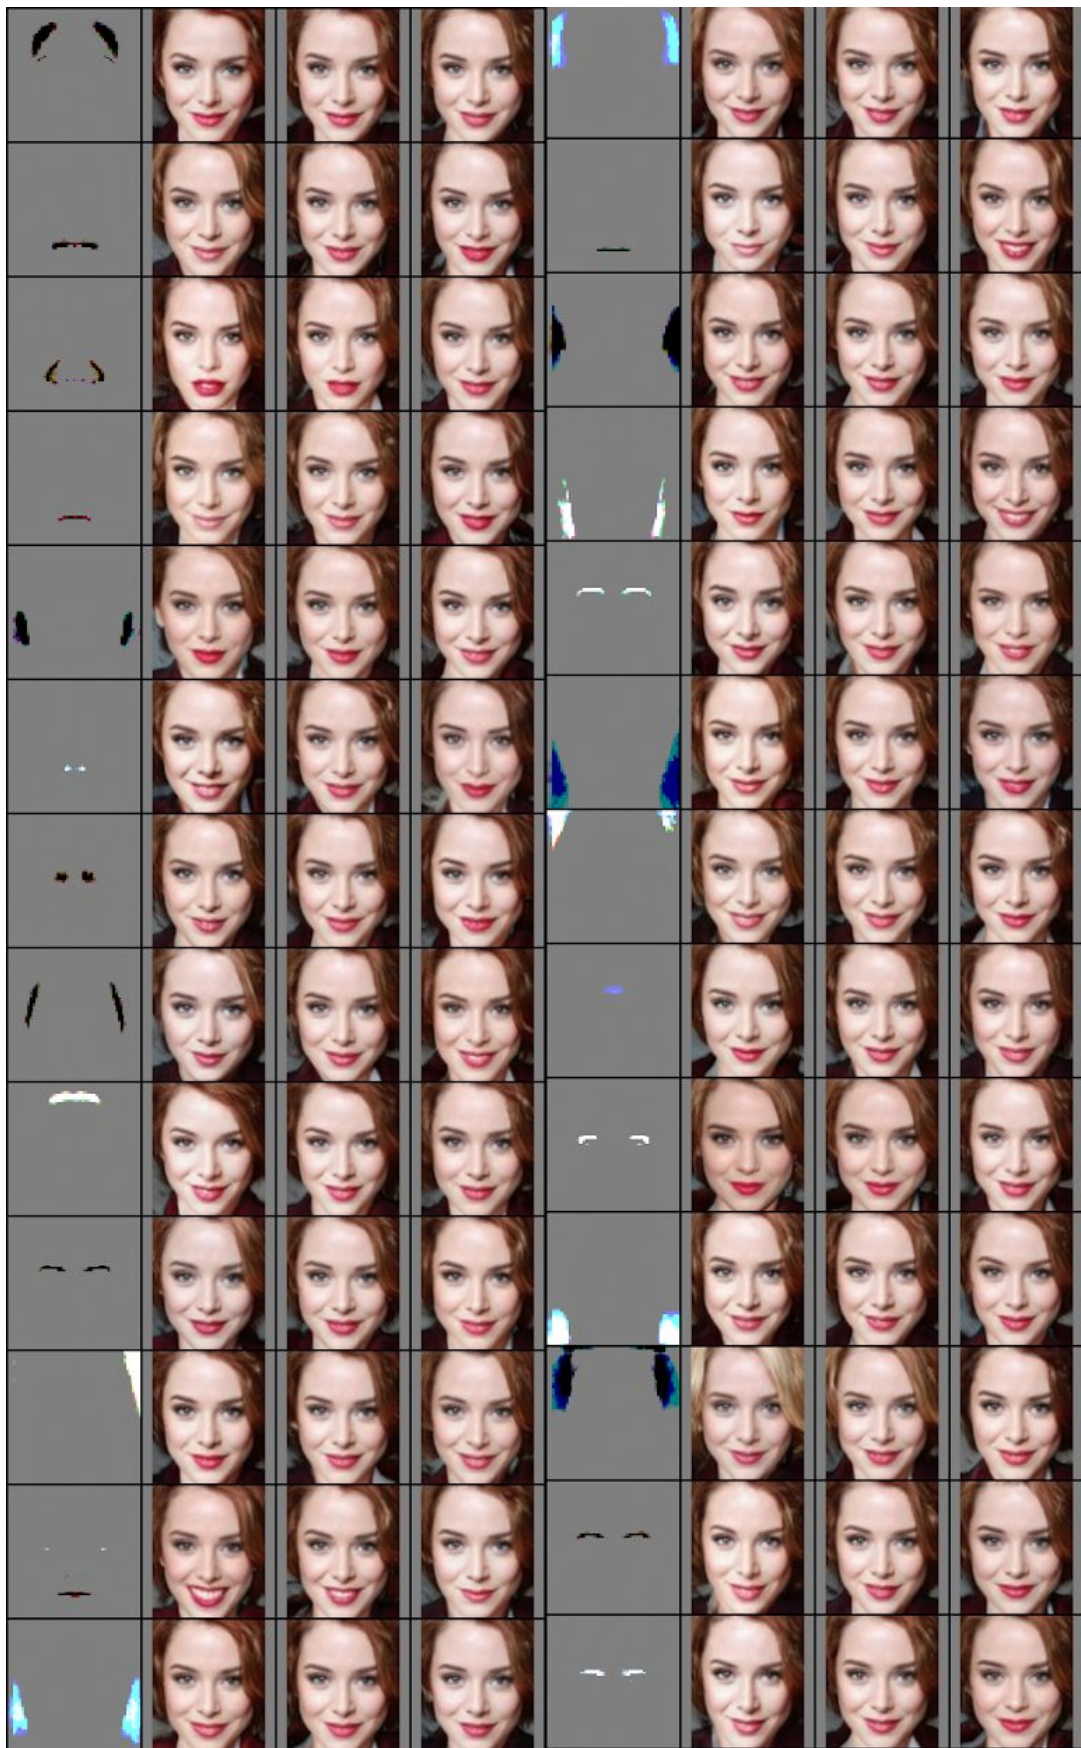

Figure 8: CASIA samples.



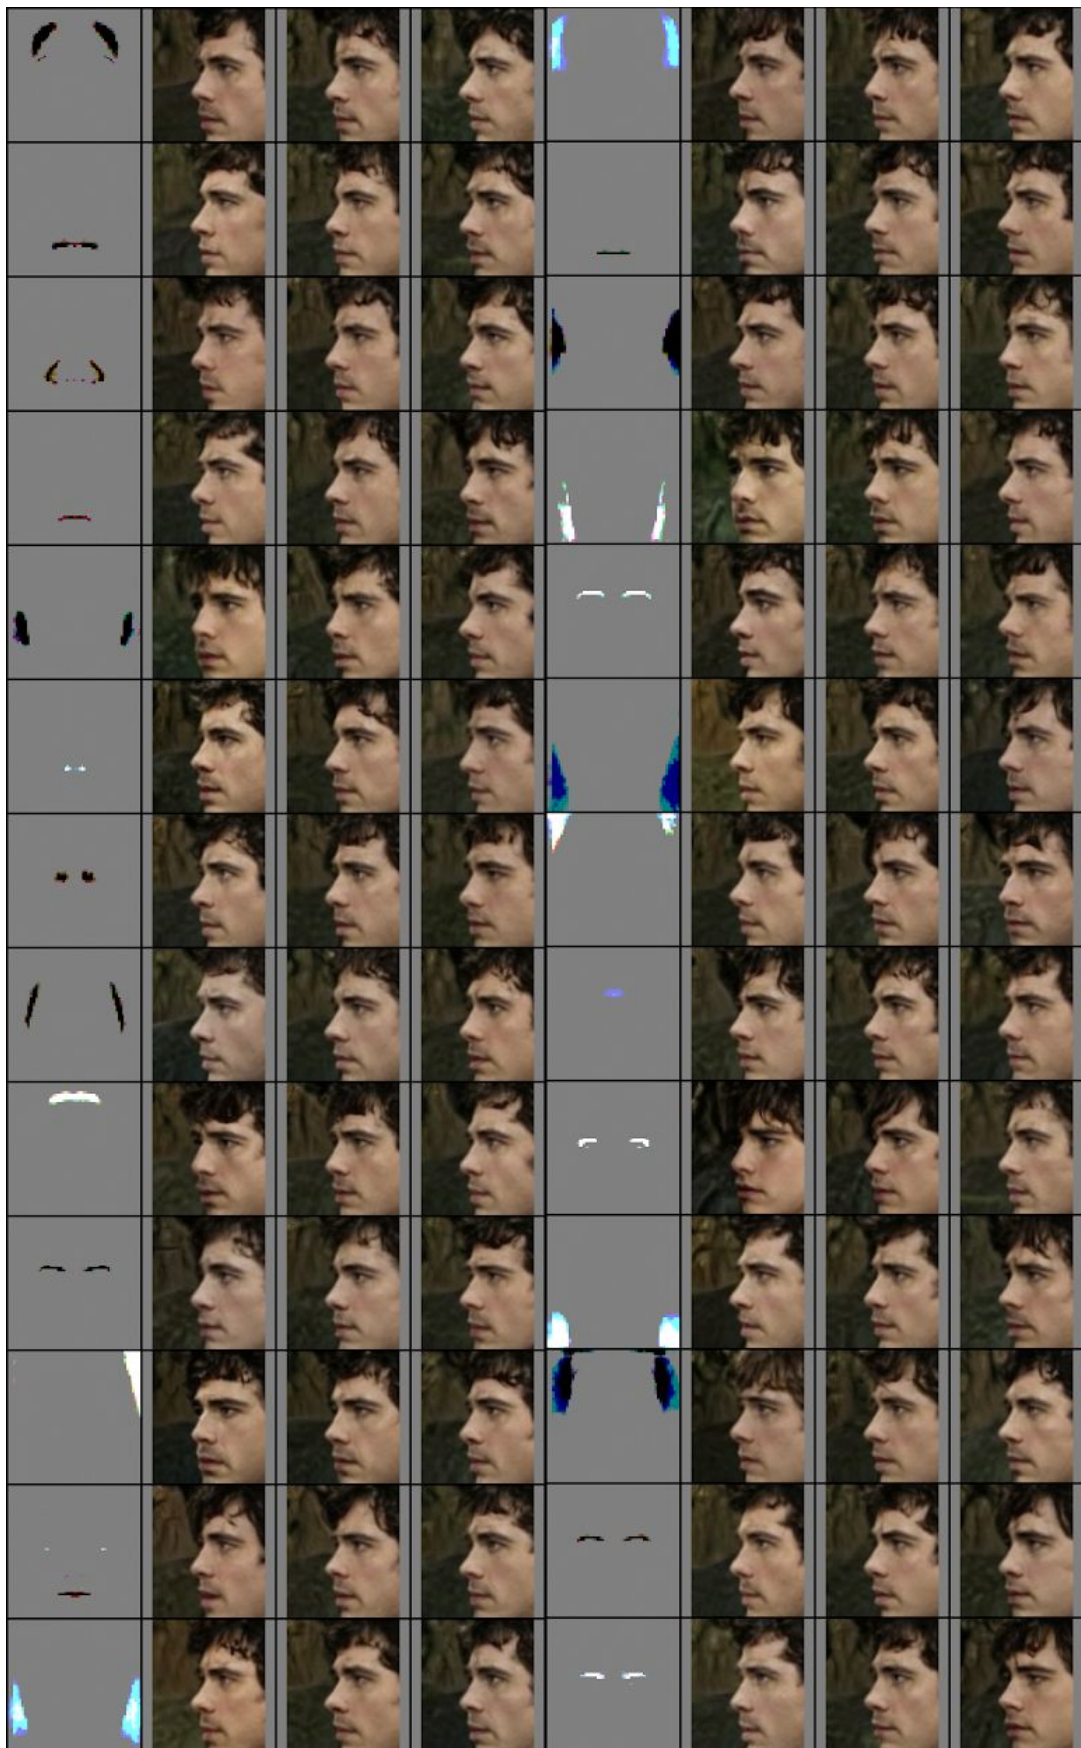

Figure 9: CASIA samples.



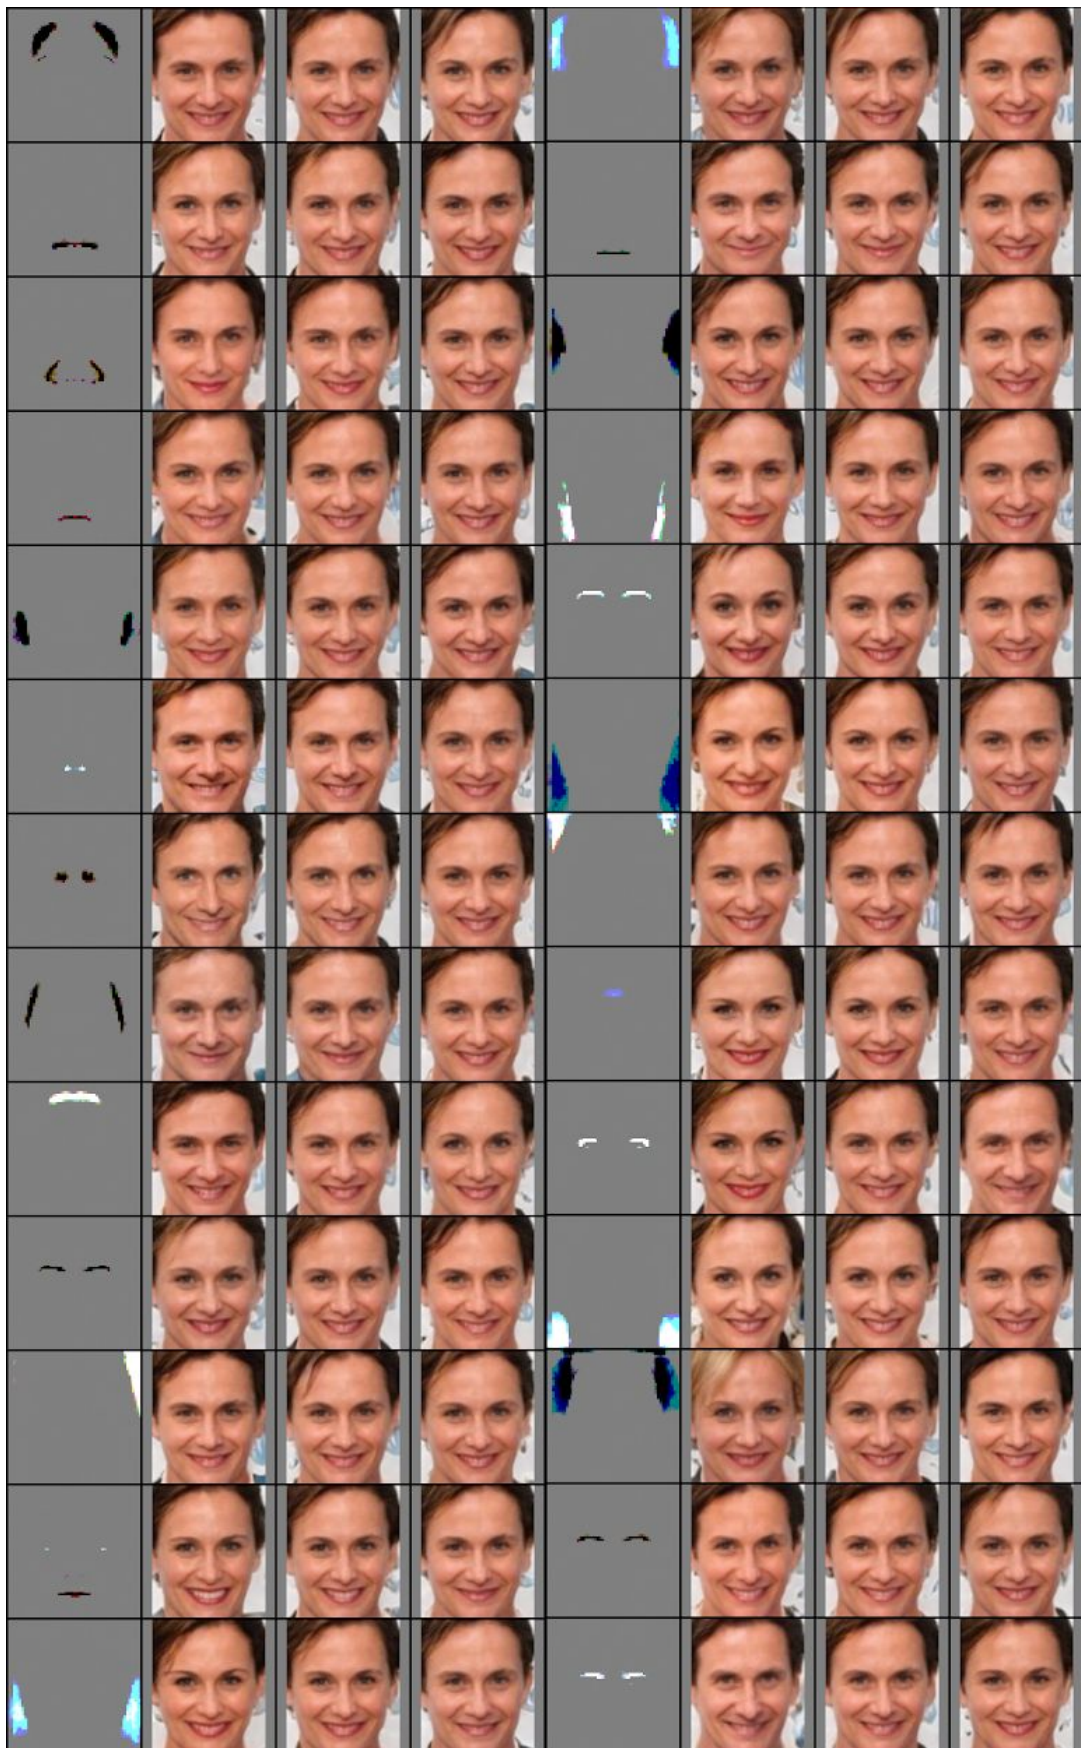

Figure 10: CASIA samples.



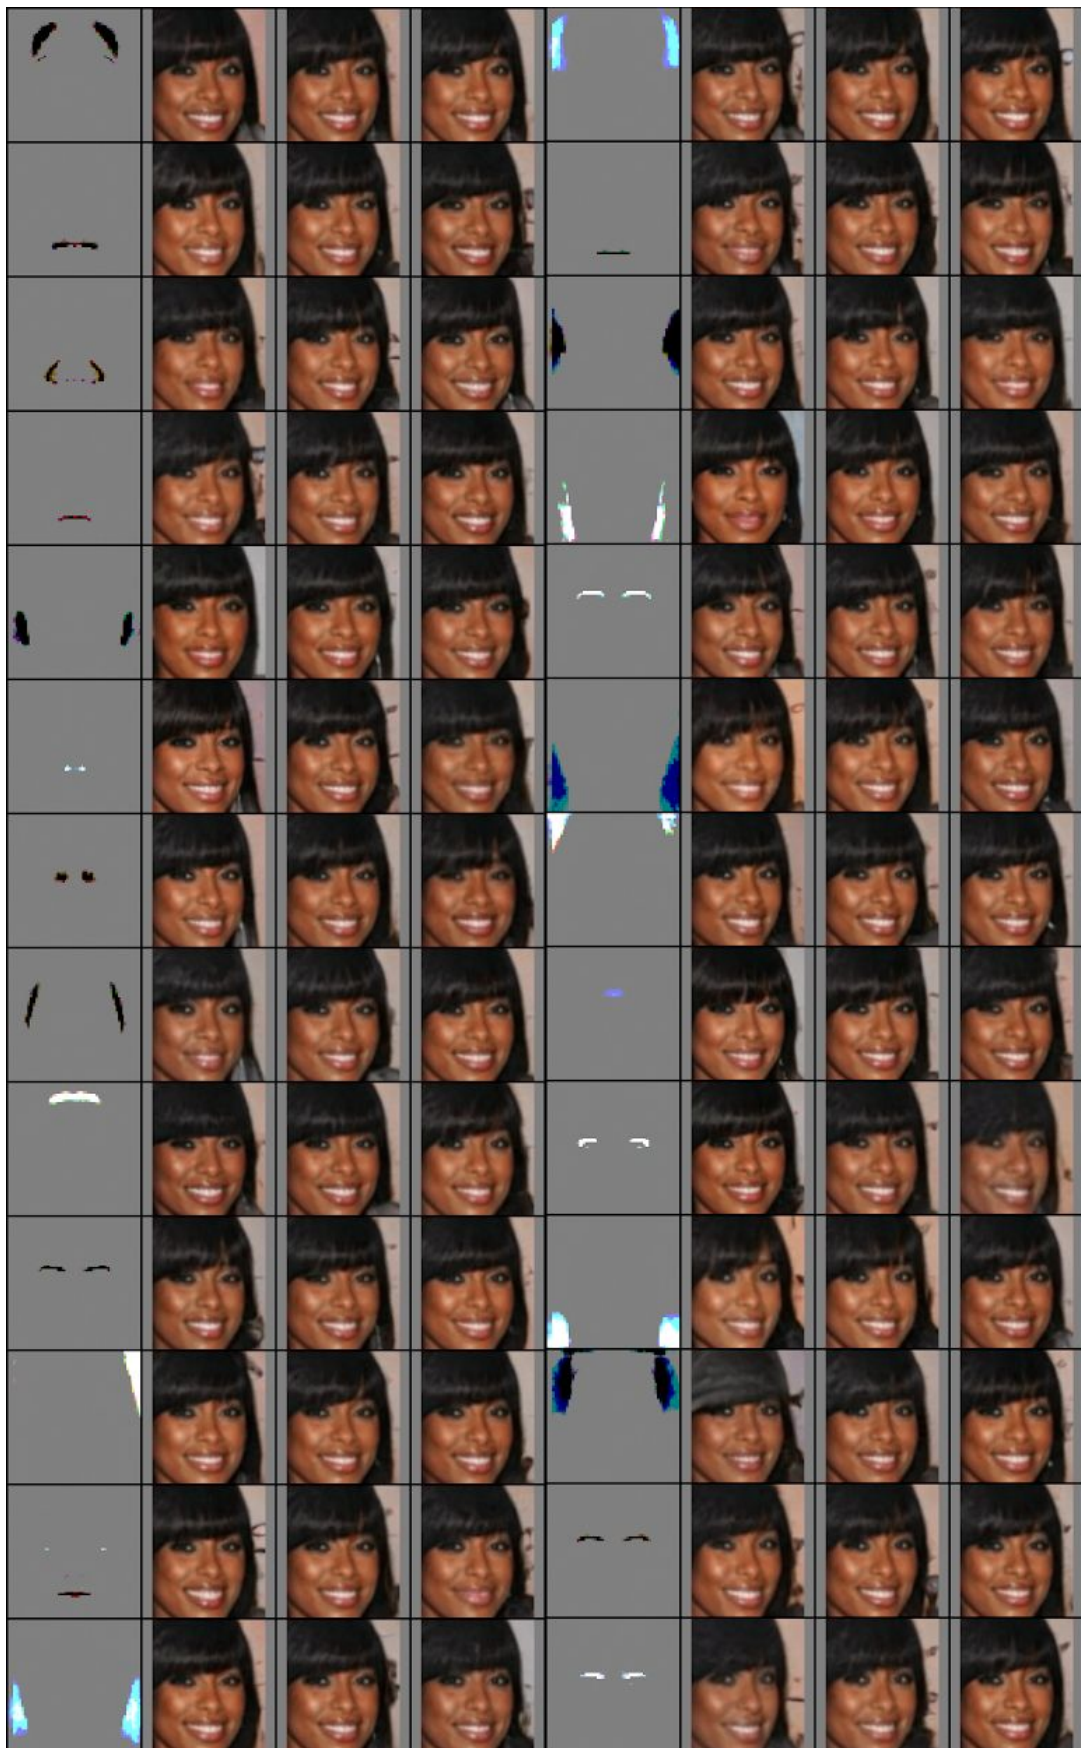

Figure 11: CASIA samples.



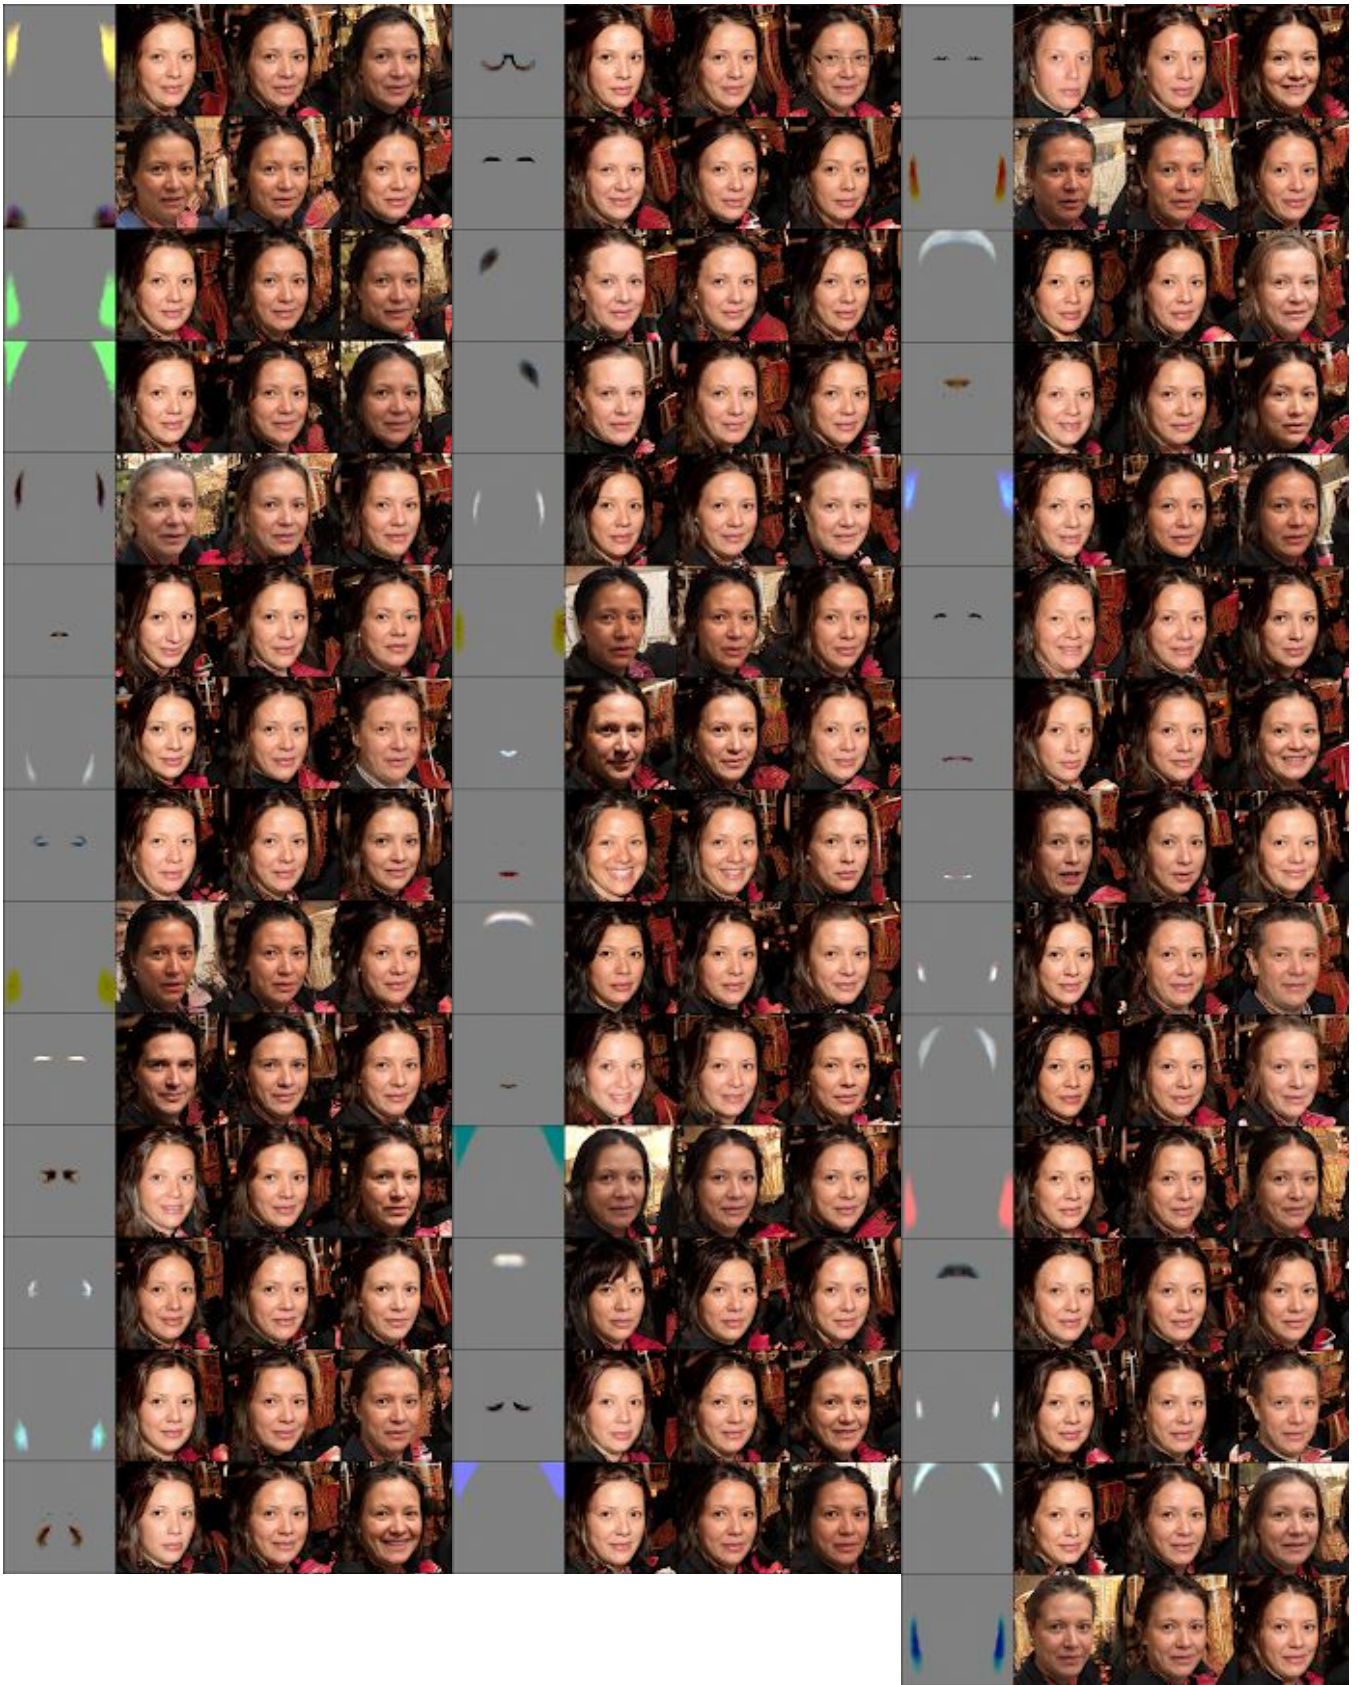

Figure 12: FFHQ samples.



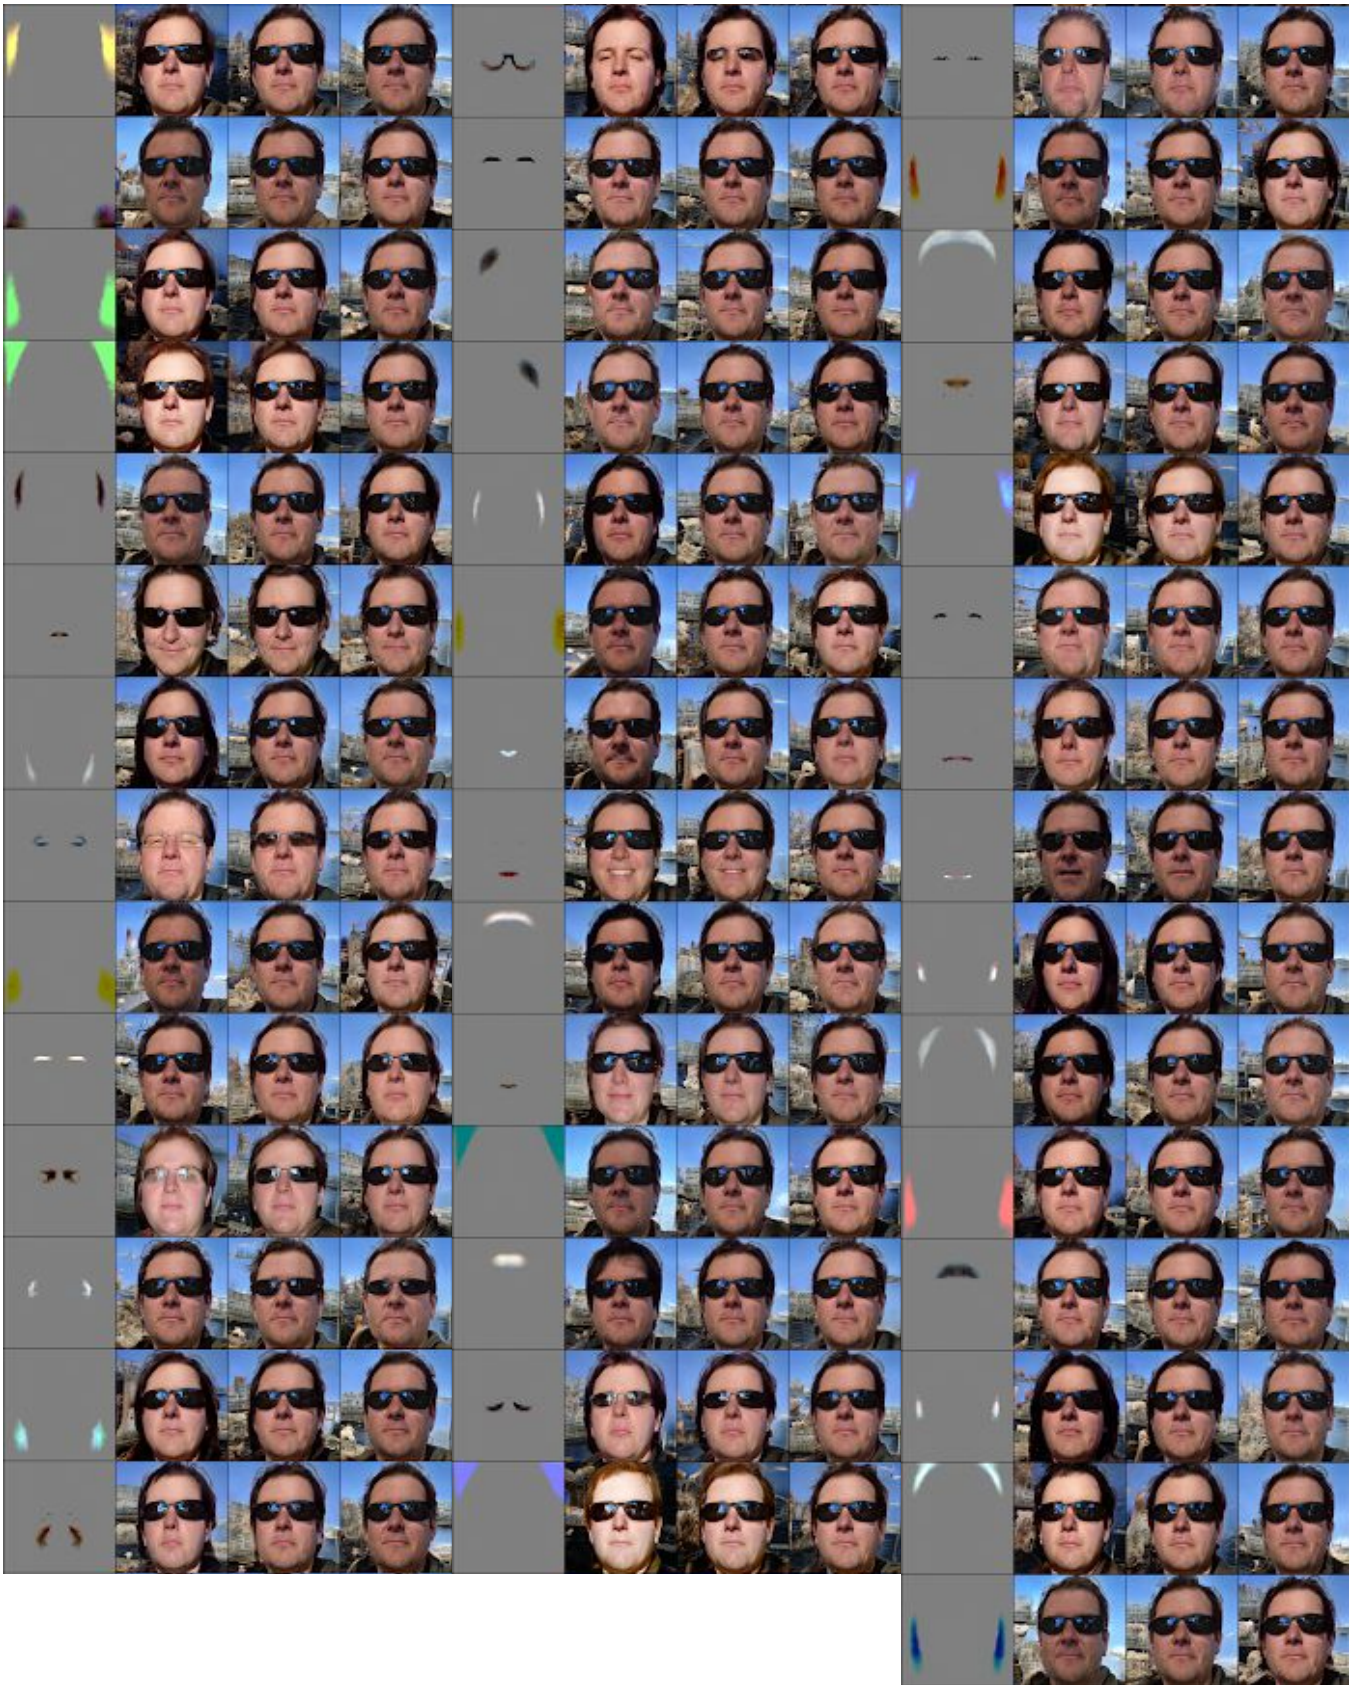

Figure 13: FFHQ samples.



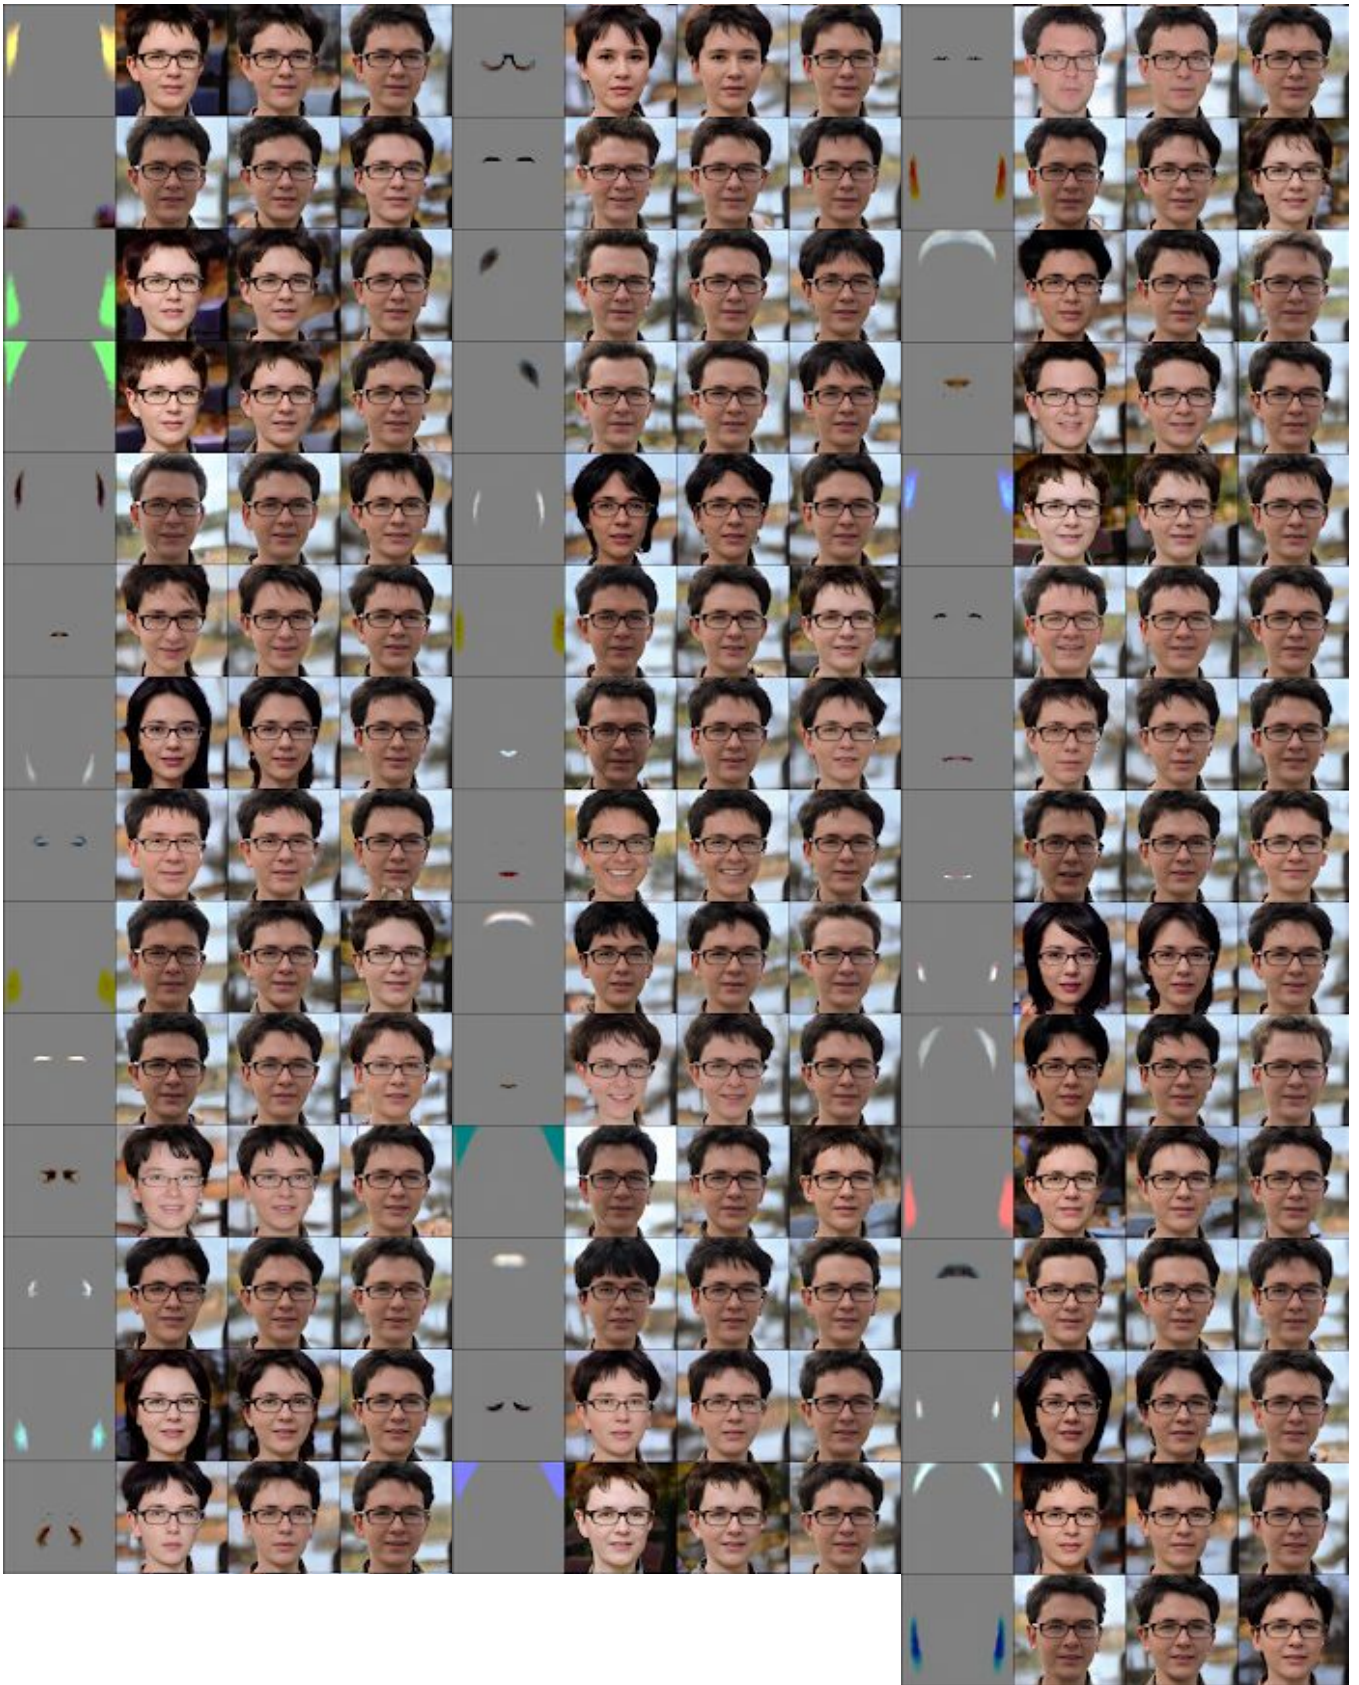

Figure 14: FFHQ samples.



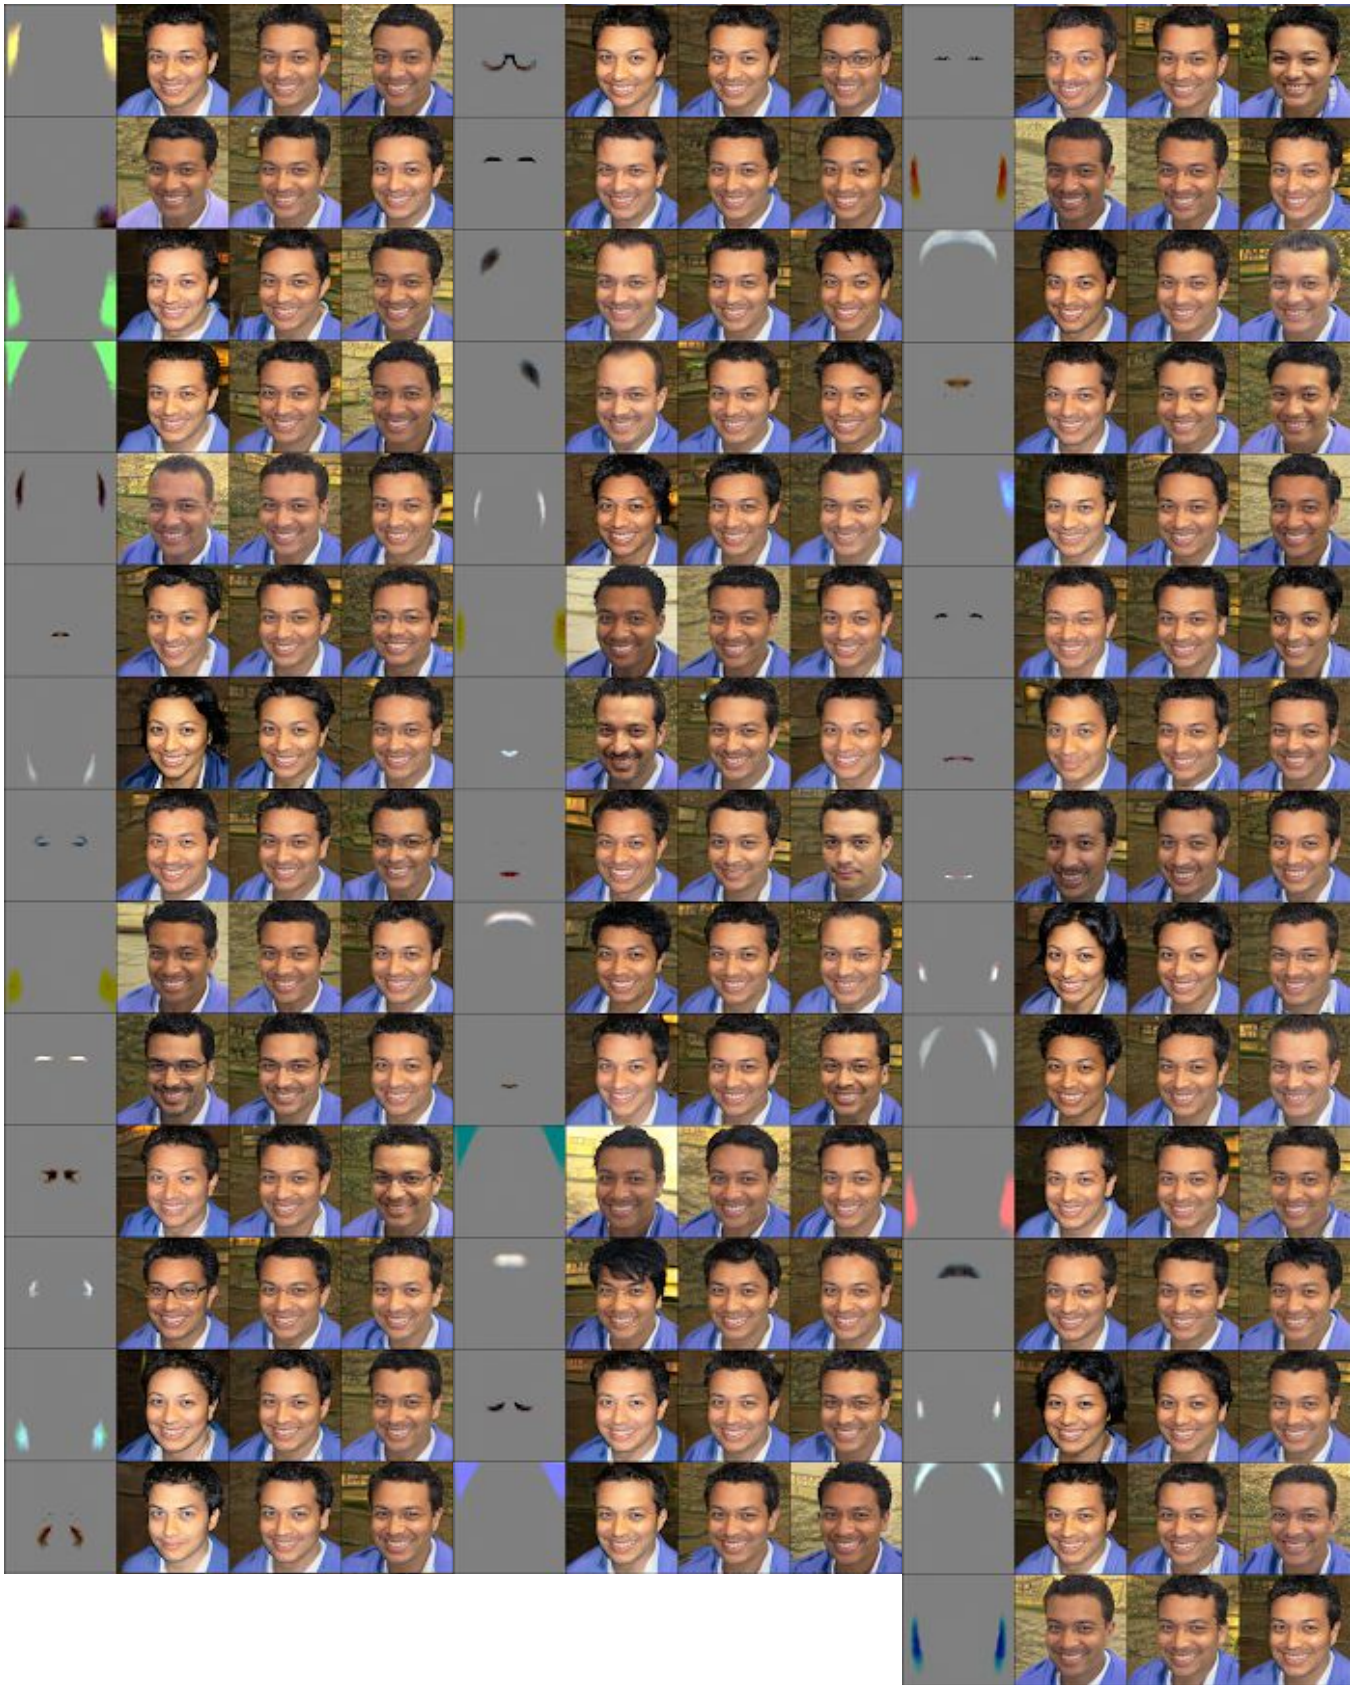

Figure 15: FFHQ samples.



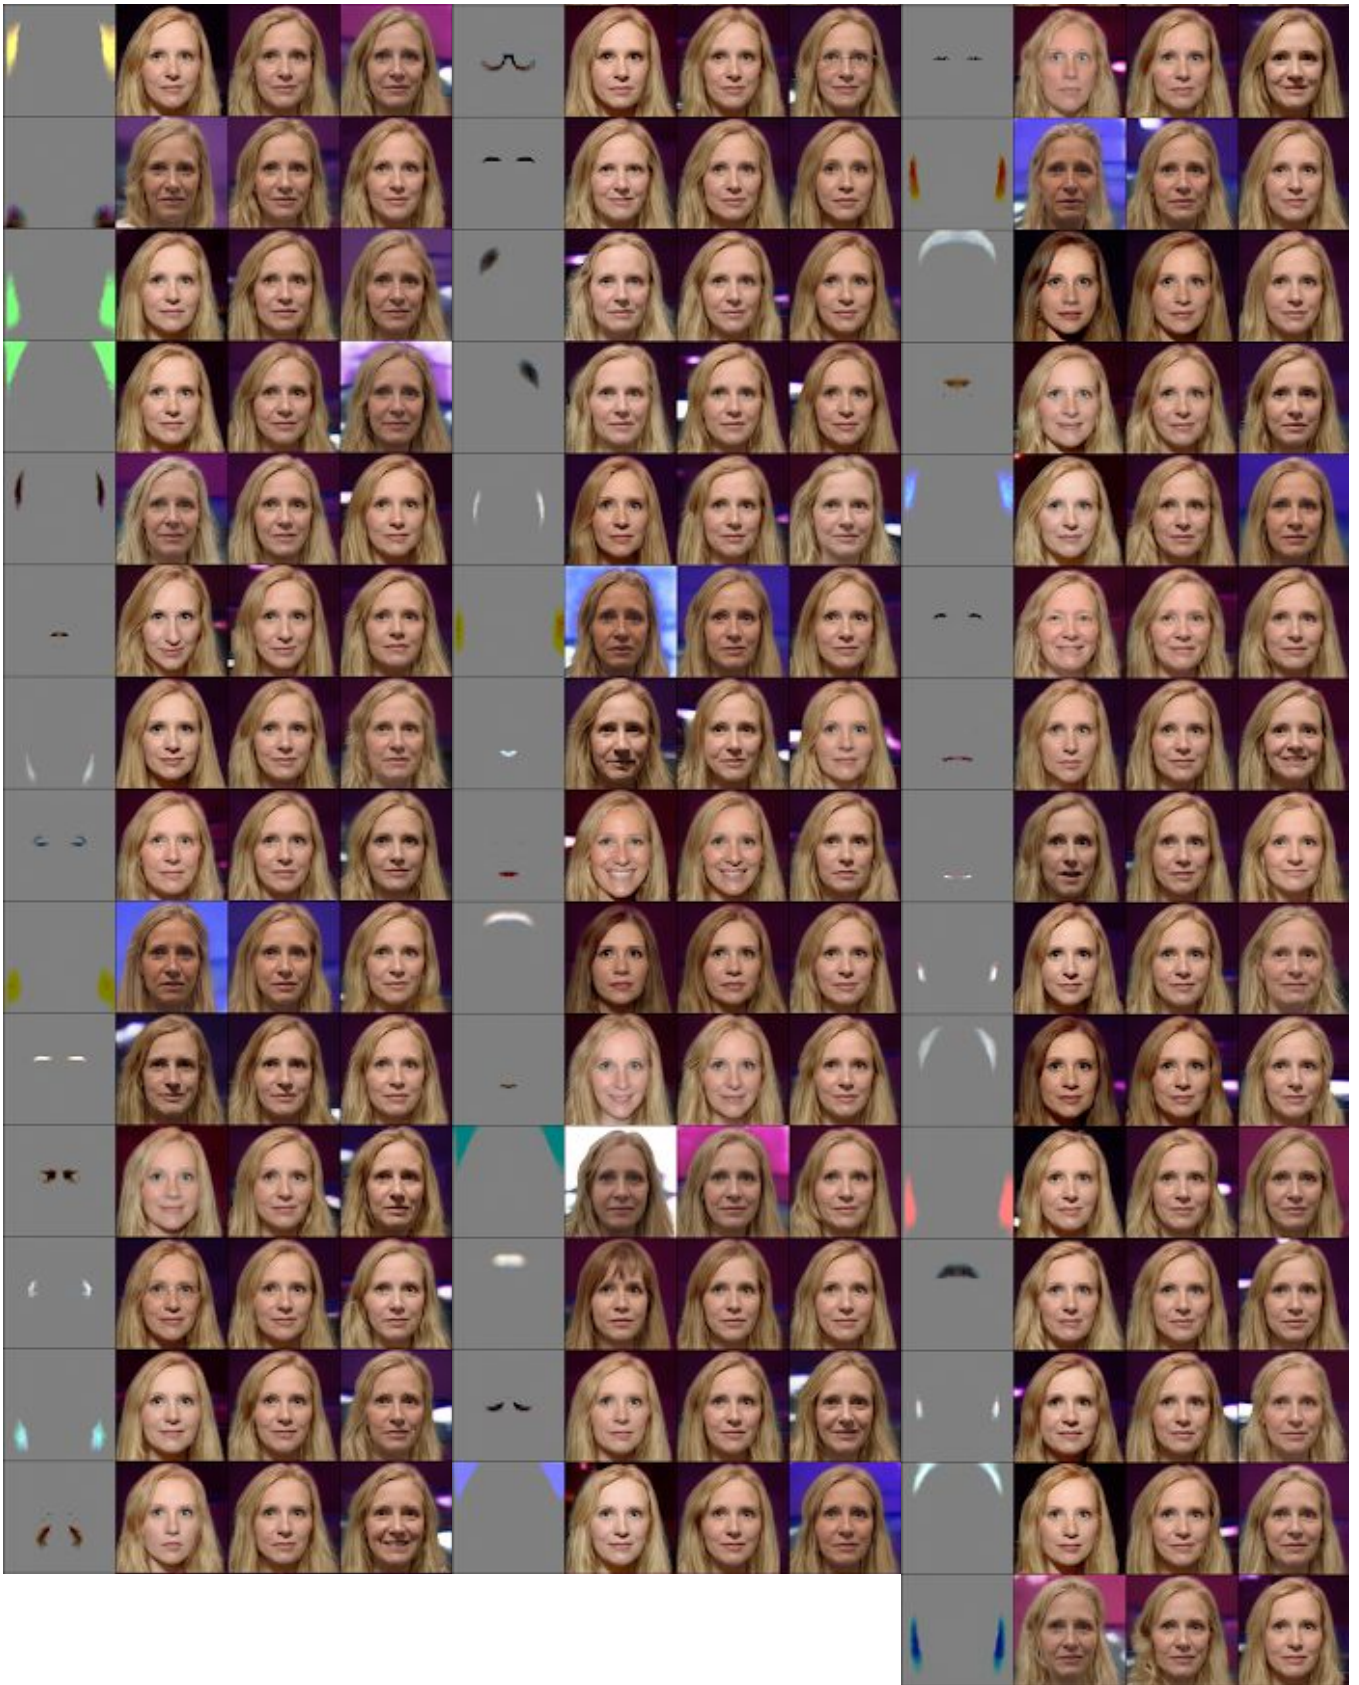

Figure 16: FFHQ samples.



## 2.1 Changing $\alpha$ value

By increasing  $\alpha$ , the number of canonical components decreases and become more sparse. However, they are not necessarily more independent.

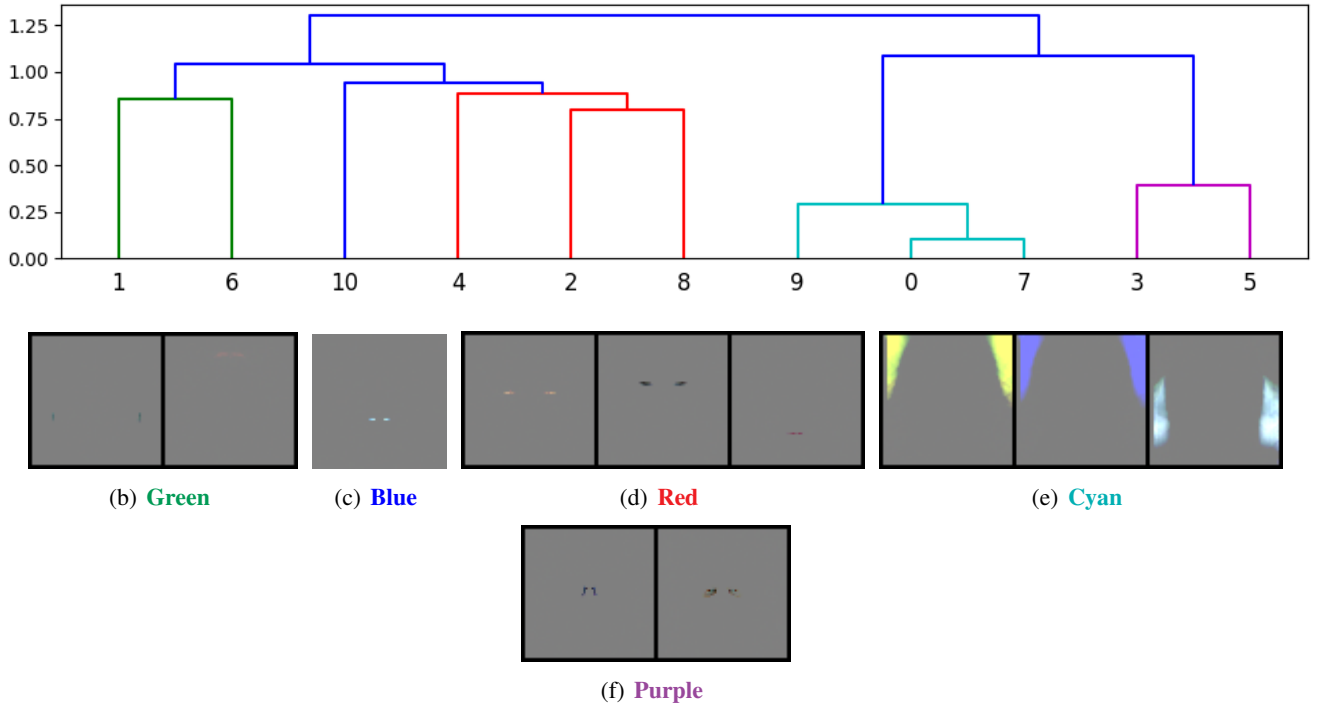

Figure 17: Albedo components of FFHQ StyleGAN with  $\alpha = 3$ ,  $\beta = 1$ .



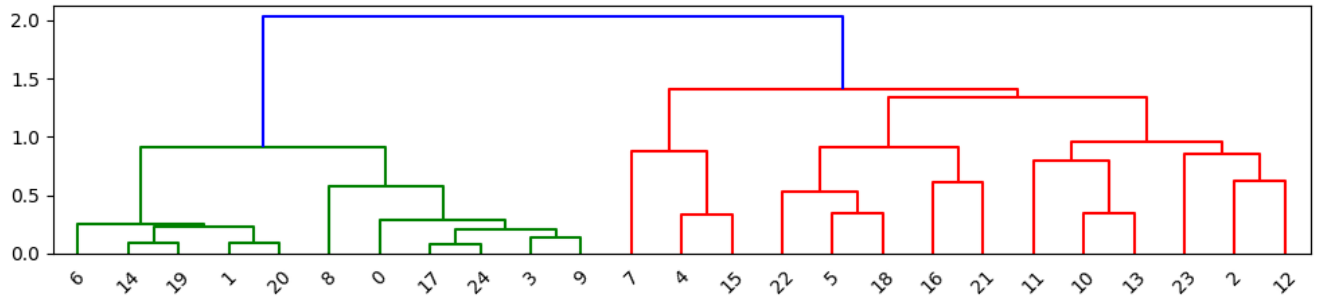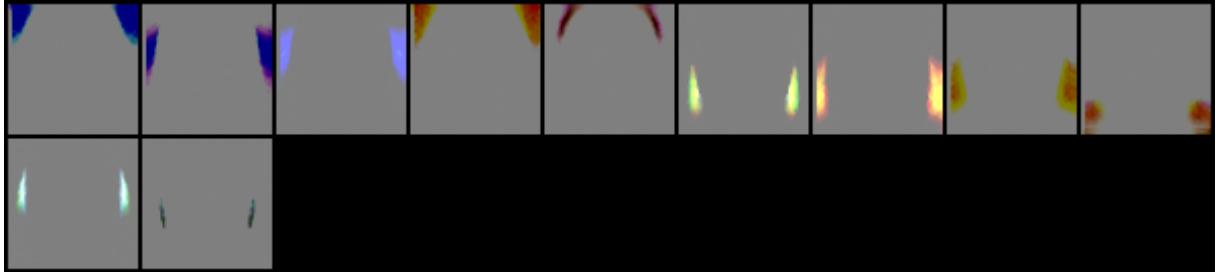

(b) **Green**

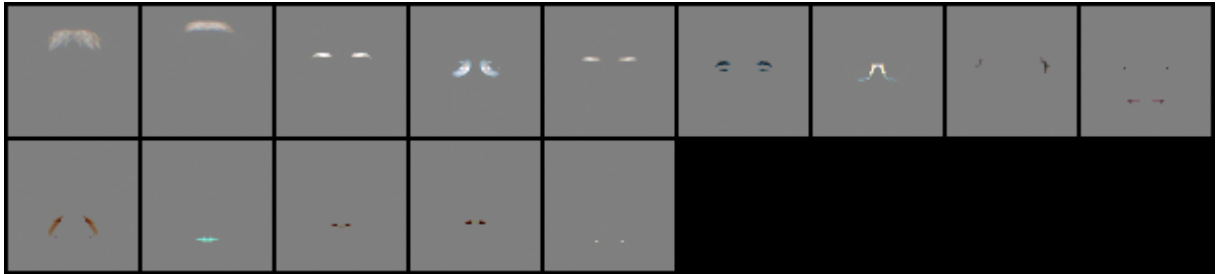

(c) **Red**

Figure 18: Albedo components of FFHQ StyleGAN with  $\alpha = 2$ ,  $\beta = 1$ .



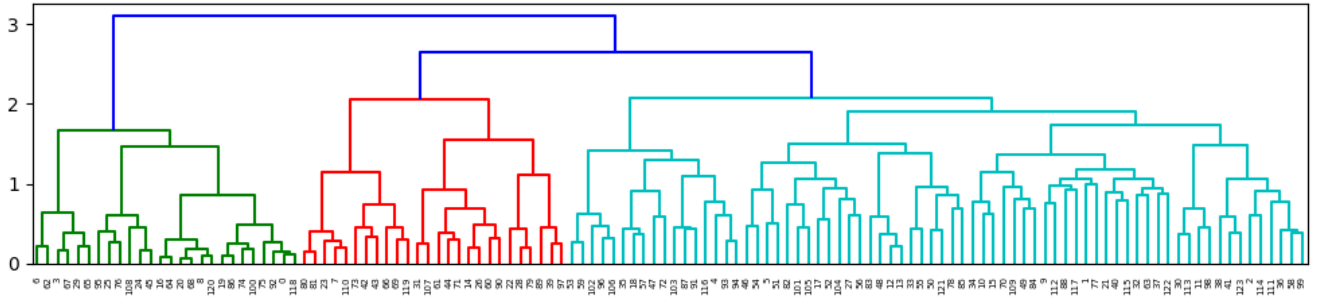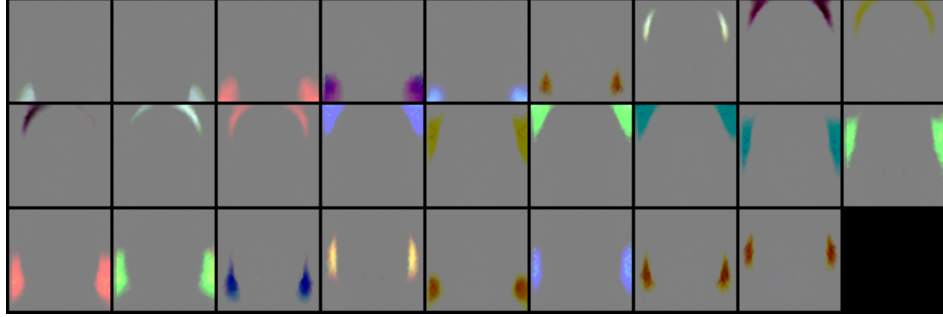

(b) Green

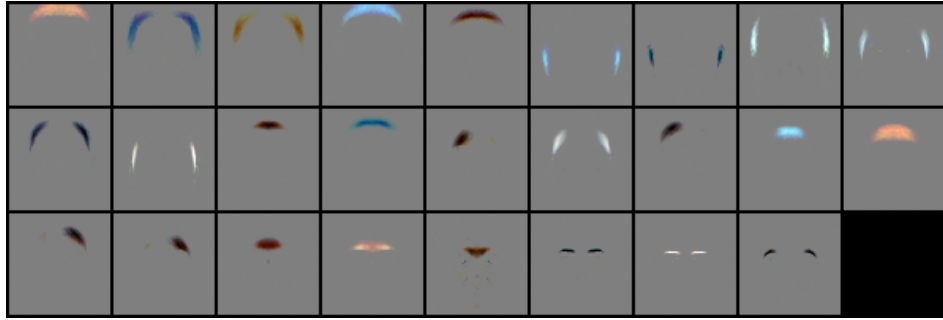

(c) Red

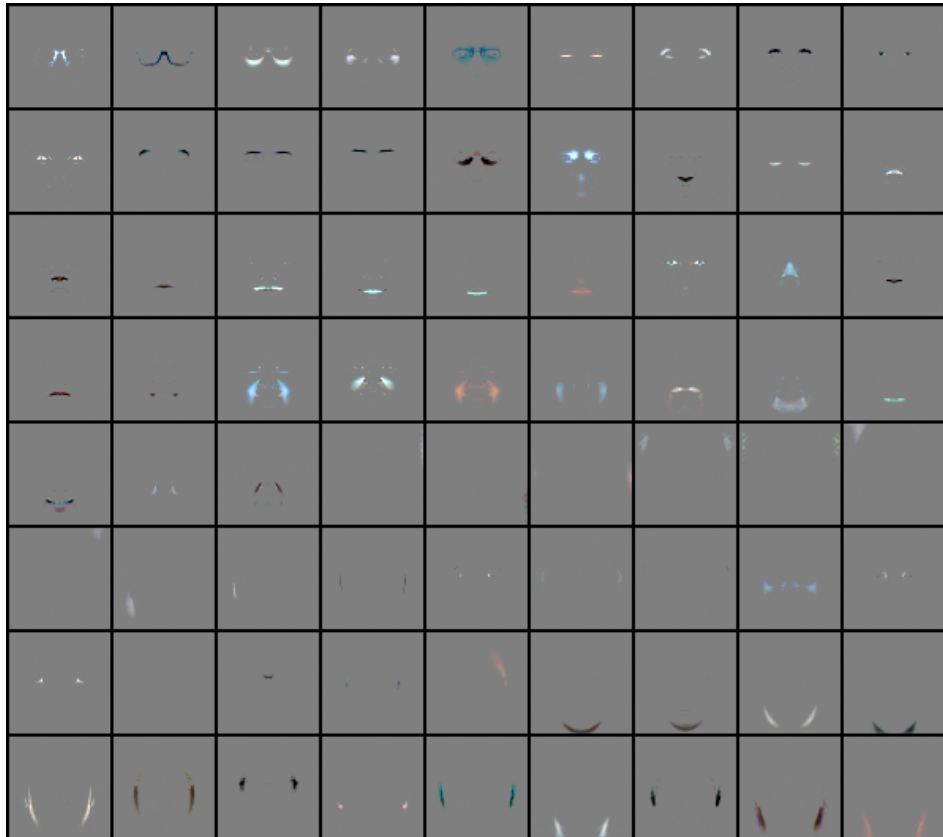

(d) Cyan

Figure 19: Albedo components of FFHQ StyleGAN with  $\alpha = 0.3, \beta = 1$ .



## 2.2 Changing $\beta$ value

By increasing  $\beta$ , we see the components distributed more independently and tend to control more pixels in the image domain.

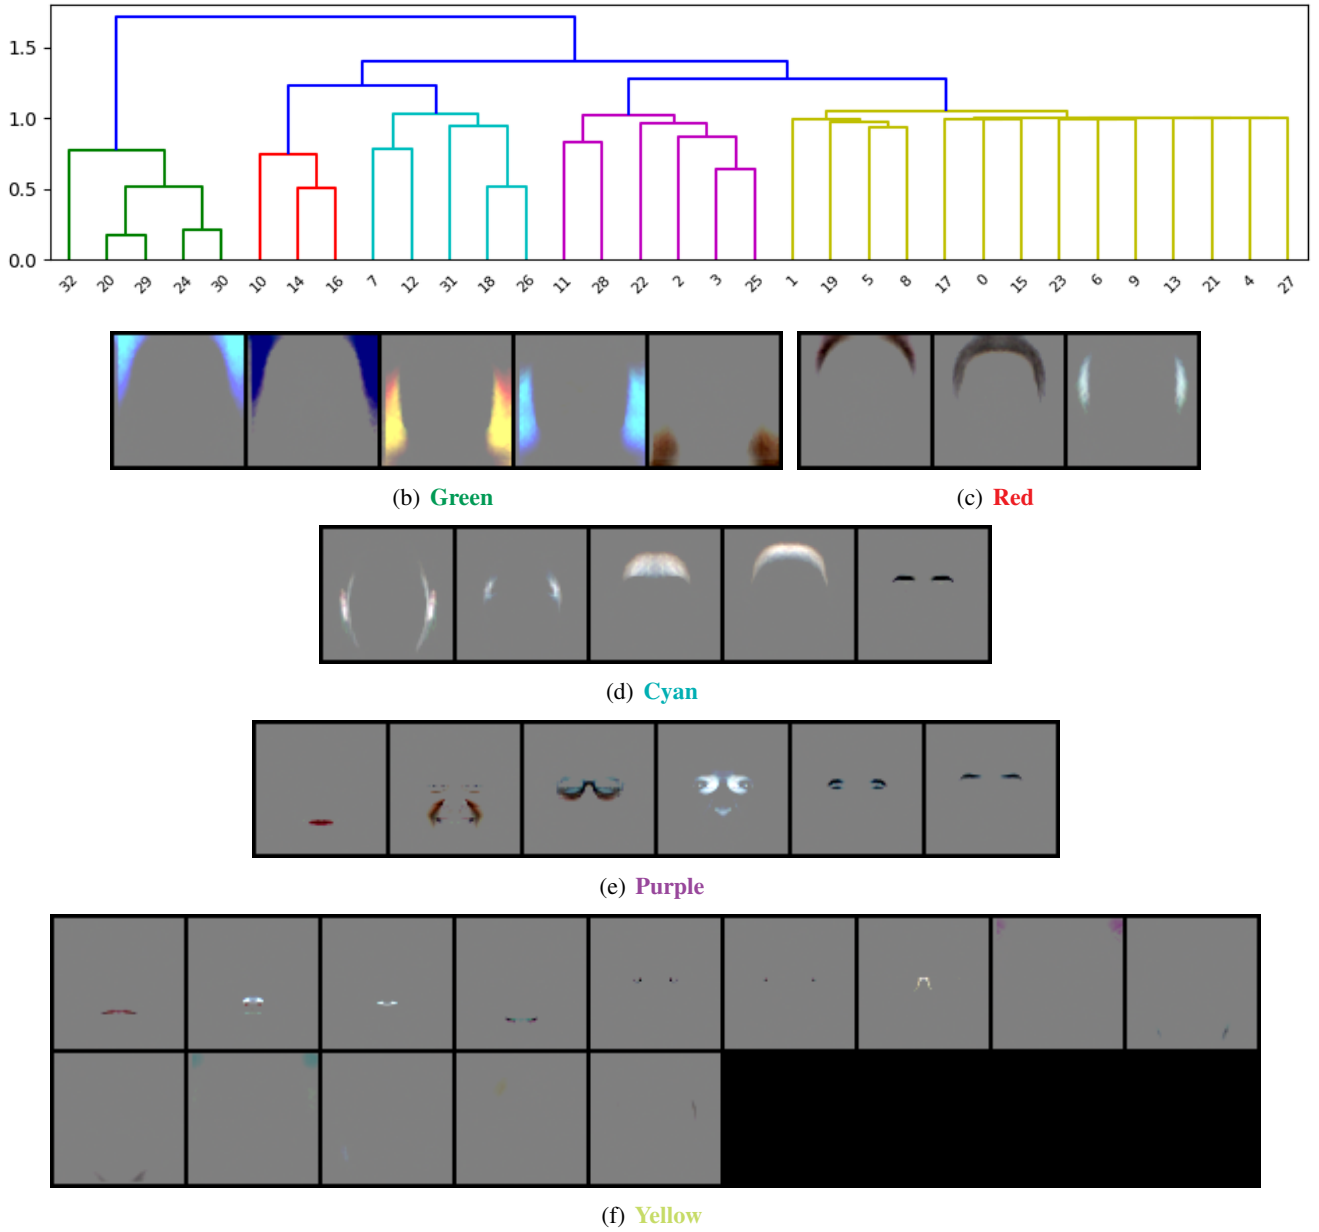

Figure 20: Albedo components of FFHQ StyleGAN with  $\alpha = 1$ ,  $\beta = 100$ .



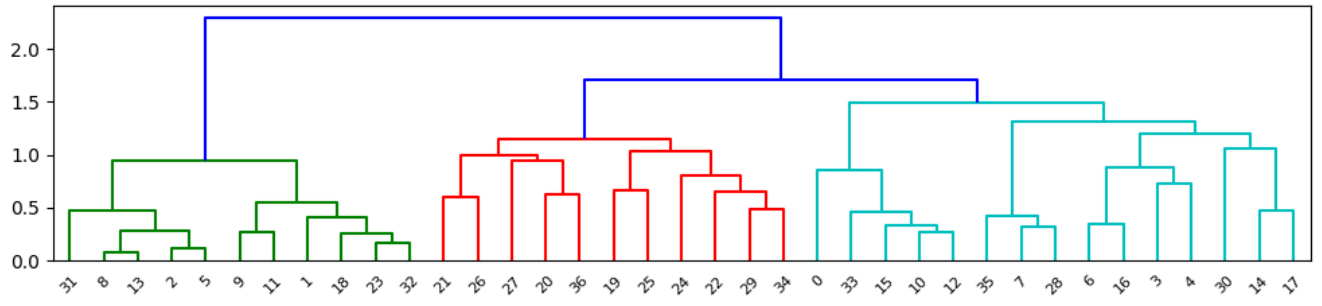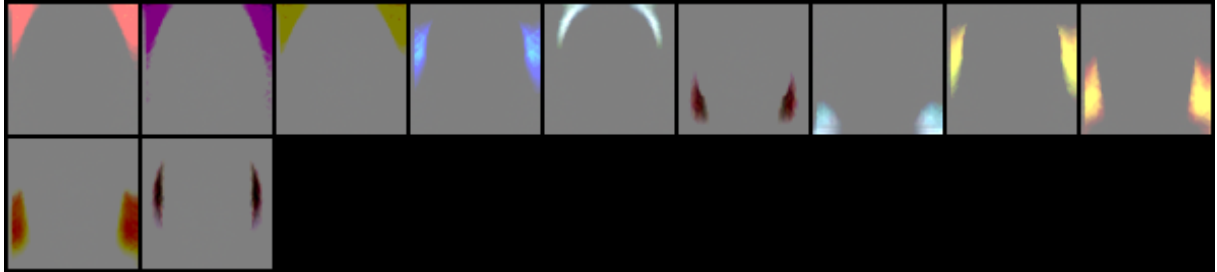

(b) **Green**

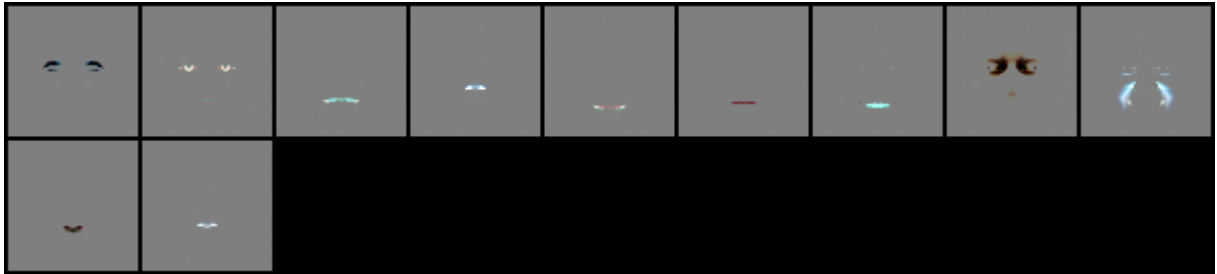

(c) **Red**

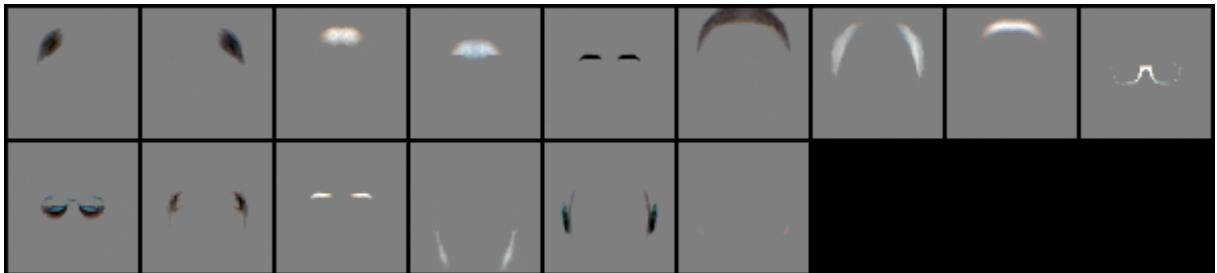

(d) **Cyan**

Figure 21: Albedo components of FFHQ StyleGAN with  $\alpha = 1$ ,  $\beta = 10$ .



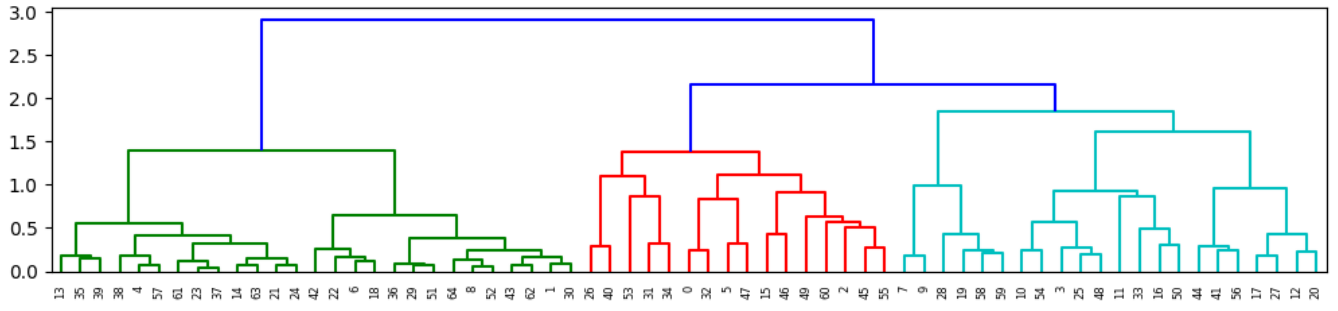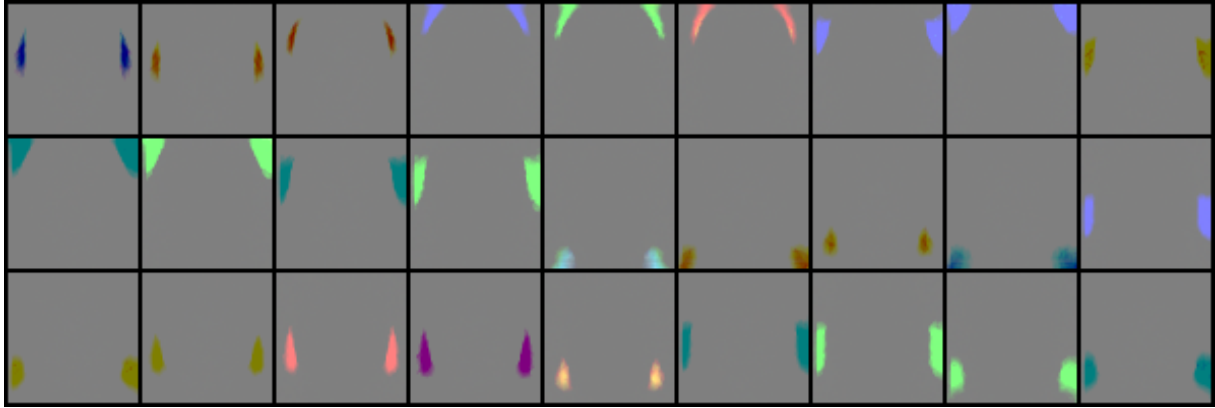

(b) **Green**

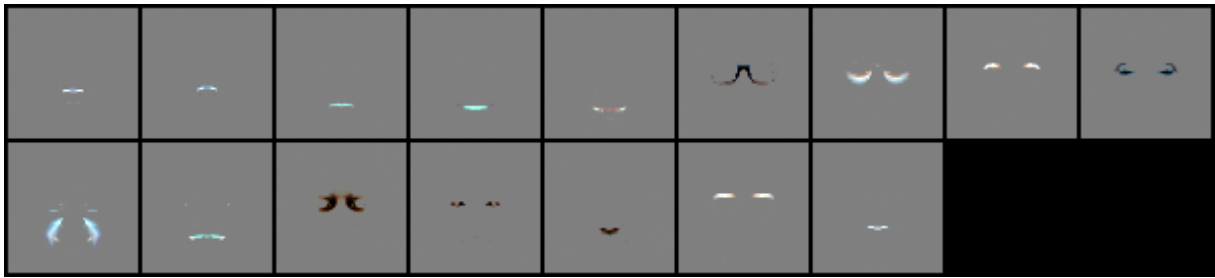

(c) **Red**

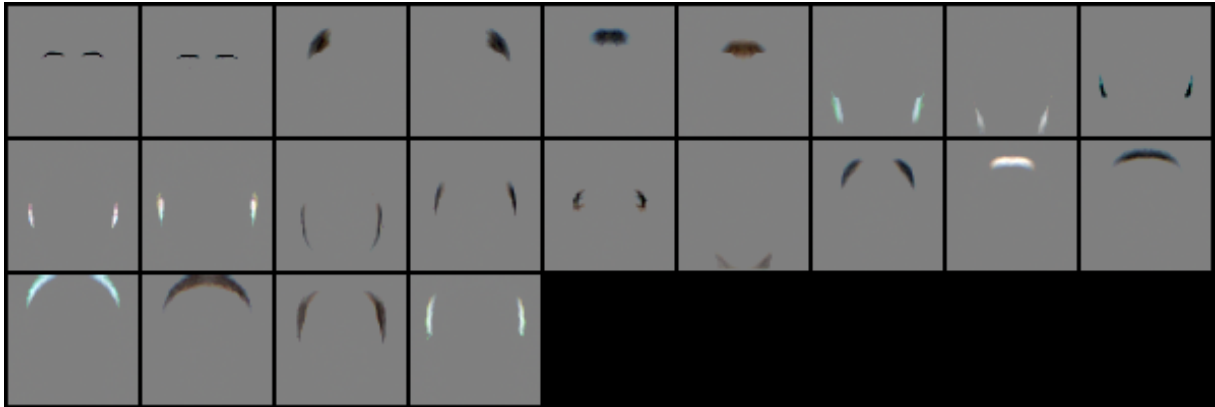

(d) **Cyan**

Figure 22: Albedo components of FFHQ StyleGAN with  $\alpha = 1$ ,  $\beta = 0.1$ .

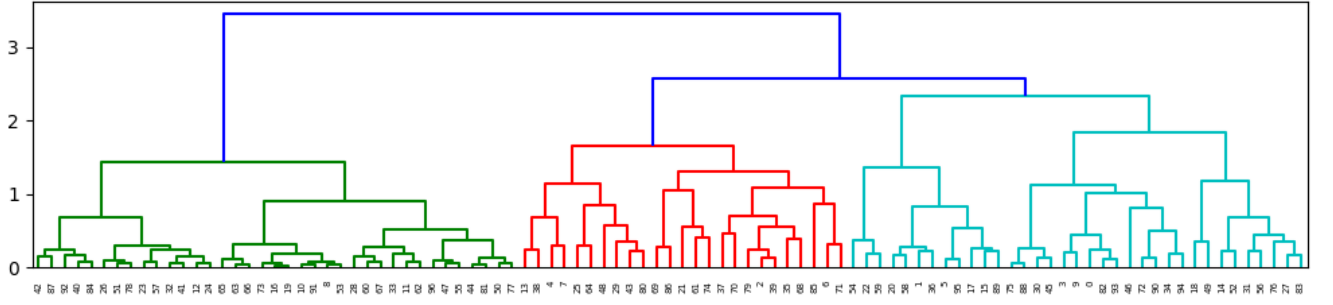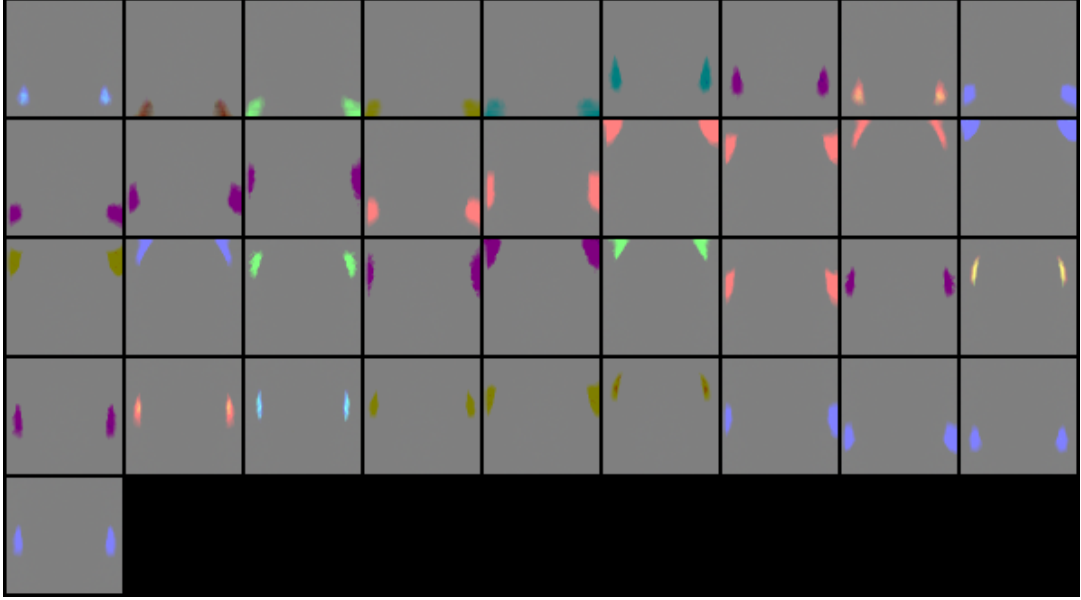

(b) **Green**

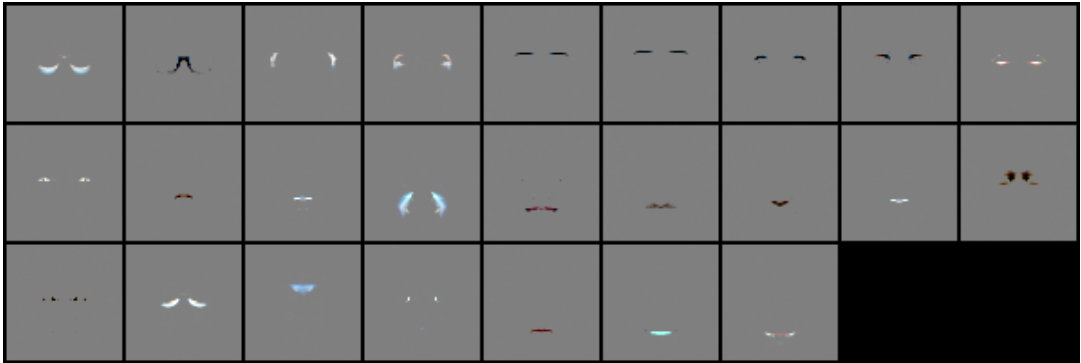

(c) **Red**

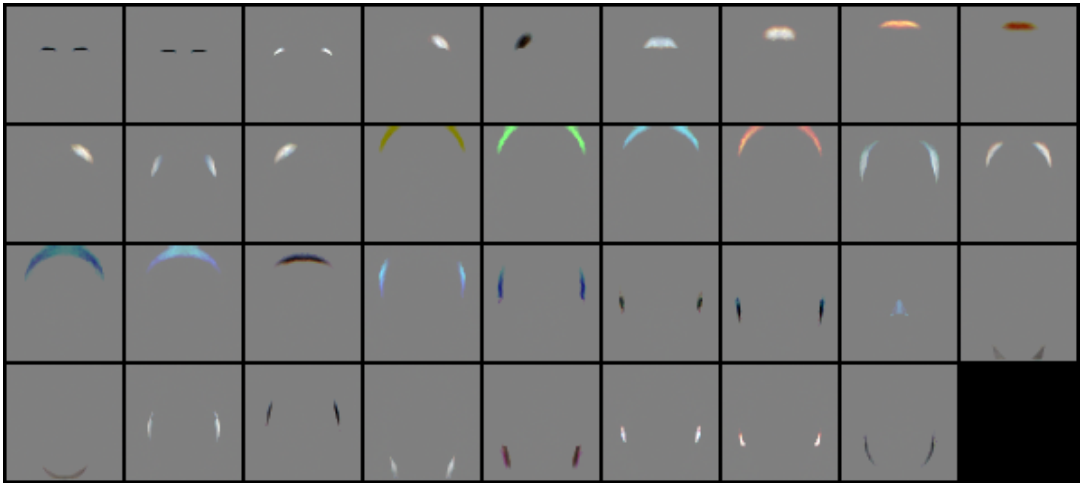

(d) **Cyan**

Figure 23: Albedo components of FFHQ StyleGAN with  $\alpha = 1, \beta = 0.01$ .



### 2.3 Similarity with CelebA facial attributes

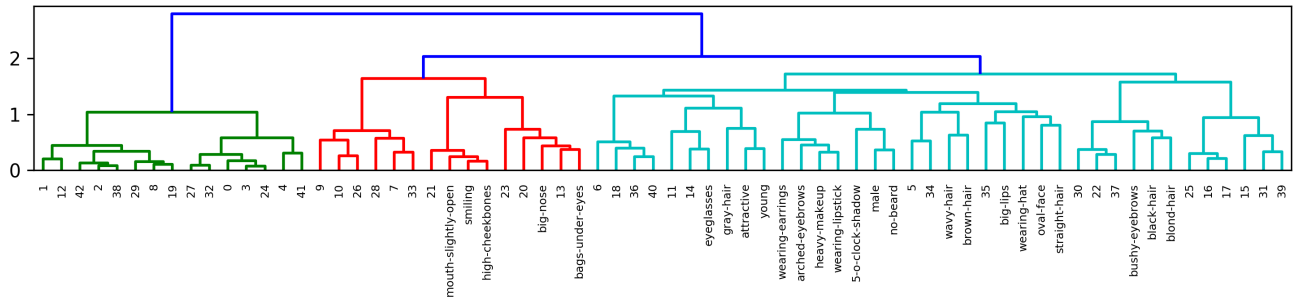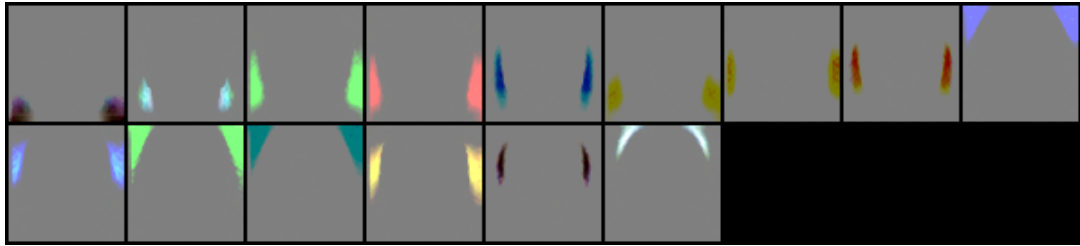

(b) **Green:** 1, 12, 2, 38, 42, 8, 19, 29, 27, 32, 3, 24, 0, 4, 41

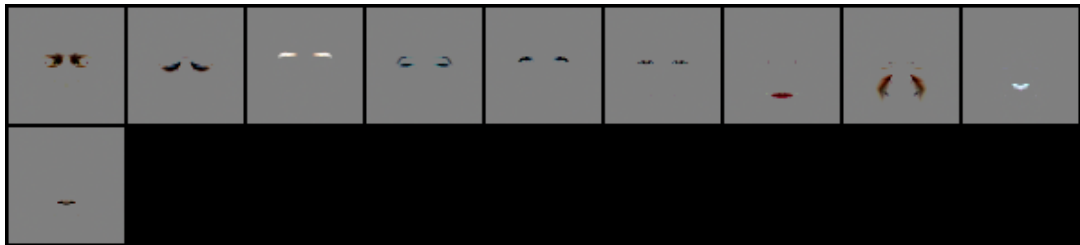

(c) **Red:** 10, 26, 9, 7, 33, 28, 21, 13, 20, 23

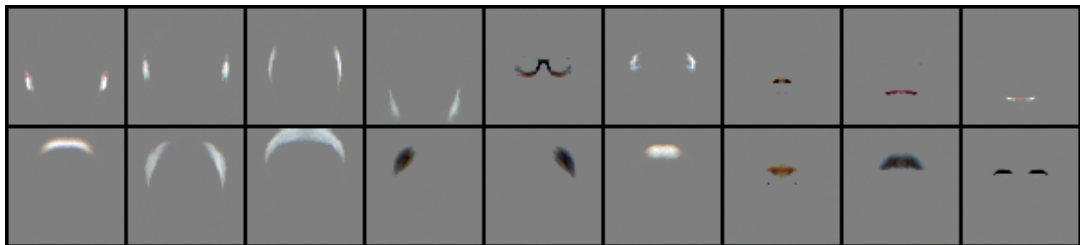

(d) **Cyan:** 36, 40, 18, 6, 14, 11, 5, 34, 35, 22, 37, 30, 16, 17, 25, 31, 39, 15

Figure 24: Cosine similarity between localized facial semantics and CelebA facial attributes.
